1           **Ran-GTP is non-essential to activate NuMA for spindle pole focusing,**  
2           **but dynamically polarizes HURP to control mitotic spindle length**

3  
4  
5   Kenta Tsuchiya<sup>1#</sup>, Hisato Hayashi<sup>1#</sup>, Momoko Nishina<sup>1#</sup>, Masako Okumura<sup>1#</sup>,  
6   Yoshikatsu Sato<sup>1</sup>, Masato T. Kanemaki<sup>2,3</sup>, Gohta Goshima<sup>1</sup>, Tomomi Kiyomitsu<sup>1,2,4\*</sup>

7  
8   <sup>1</sup> Division of Biological Science, Graduate School of Science, Nagoya University,  
9   Chikusa-ku, Nagoya 464-8602, Japan.

10   <sup>2</sup> Precursory Research for Embryonic Science and Technology (PRESTO) Program,  
11   Japan Science and Technology Agency, 4-1-8 Honcho Kawaguchi, Saitama 332-0012,  
12   Japan.

13   <sup>3</sup> Department of Chromosome Science, National Institute of Genetics, Research  
14   Organization of Information and Systems (ROIS), and Department of Genetics,  
15   SOKENDAI (The Graduate University of Advanced Studies), Yata 1111, Mishima,  
16   Shizuoka 411-8540, Japan.

17   <sup>4</sup> Okinawa Institute of Science and Technology Graduate University, 1919-1 Tancha,  
18   Onna-son, Kunigami-gun, Okinawa 904-0495, Japan

19  
20   # These authors contributed equally to this work.

21   \* Corresponding author:

22   E-mail: [tomomi.kiyomitsu@oist.jp](mailto:tomomi.kiyomitsu@oist.jp)

23   Phone & Fax: +81-98-966-1609

24   Characters: 5,173 words

25

26 **Abstract**

27 During mitosis, a bipolar spindle is assembled around chromosomes to efficiently  
28 capture chromosomes. Previous work proposed that a chromosome-derived Ran-GTP  
29 gradient promotes spindle assembly around chromosomes by liberating spindle  
30 assembly factors (SAFs) from inhibitory importins. However, Ran's dual functions in  
31 interphase nucleocytoplasmic transport and mitotic spindle assembly have made it  
32 difficult to assess its mitotic roles in somatic cells. Here, using auxin-inducible degron  
33 technology in human cells, we developed acute mitotic degradation assays to dissect  
34 Ran's mitotic roles systematically and separately from its interphase function. In  
35 contrast to the prevailing model, we found that the Ran pathway is not essential for  
36 spindle assembly activities that occur at sites spatially separated from chromosomes,  
37 including activating NuMA for spindle pole focusing or for targeting TPX2. In contrast,  
38 Ran-GTP is required to localize HURP and HSET specifically at chromosome-proximal  
39 regions. We demonstrated that Ran-GTP and importin- $\beta$  coordinately promote HURP's  
40 dynamic microtubule binding-dissociation cycle near chromosomes, which results in  
41 stable kinetochore-fiber formation. Intriguingly, this pathway acts to establish proper  
42 spindle length preferentially during prometaphase, rather than metaphase. Together, we  
43 propose that the Ran pathway is required to activate SAFs specifically near  
44 chromosomes, but not generally during human mitotic spindle assembly. Ran-  
45 dependent spindle assembly is likely coupled with parallel pathways to activate SAFs,  
46 including NuMA, for spindle pole focusing away from chromosomes.

47

48 **Highlights**

- 49 • Using auxin-inducible degron technology, we developed mitotic degradation assays  
50 for the Ran pathway in human cells.
- 51 • The Ran pathway is non-essential to activate NuMA for spindle pole focusing.
- 52 • The Ran pathway dynamically polarizes HURP and defines mitotic spindle length  
53 preferentially during prometaphase.
- 54 • Ran-GTP is required to activate SAFs specifically near chromosomes, but not  
55 generally, in human mitotic cells.

56

57

## 58 **Introduction**

59 During cell division, a microtubule-based spindle structure is assembled around  
60 chromosomes to efficiently capture and segregate duplicated chromosomes into  
61 daughter cells [1, 2]. To assemble a spindle around chromosomes, chromosomes  
62 generate a gradient of Ran-GTP, a GTP-bound form of Ran, in animal cells [3, 4]. Ran-  
63 GTP is produced by regulator of chromosome condensation 1 (RCC1), a guanine  
64 nucleotide exchange factor for Ran [5], and is hydrolyzed to Ran-GDP by RanGAP1, a  
65 GTPase-activating protein for Ran [6]. Because RCC1 and RanGAP1 mainly localize on  
66 chromosomes and in cytoplasm, respectively, these opposing enzymes create a  
67 chromosome-derived Ran-GTP gradient after the nuclear envelope breaks down (Fig.  
68 2A). During interphase, these enzymes generate different Ran-GTP concentrations in  
69 the nucleus and cytoplasm, which drives nucleocytoplasmic transport [4]. The Ran-GTP  
70 gradient has been best characterized in *Xenopus* egg extracts [7, 8], but is also found in  
71 other meiotic and mitotic cell types [9-11]. Recent studies indicate that Ran-GTP is  
72 essential for acentrosomal spindle assembly in female meiosis [9, 12, 13], but the  
73 significance of Ran-GTP in mitotic spindle assembly has been debated [10, 11, 14]. The  
74 dual functions of Ran in both interphase and mitosis have made it difficult to identify its  
75 mitotic roles in somatic cells.

76 As in mechanisms in nucleocytoplasmic transport, Ran-GTP binds to importin- $\beta$   
77 and releases inhibitory importins from SAFs, thereby activating SAFs near  
78 chromosomes (Fig. 2A) [15-18]. Once activated, most SAFs interact with microtubules  
79 and spatially regulate microtubule nucleation, dynamics, transport, and cross-linking, to  
80 create specialized local structures of the spindle [3, 4]. For instance, nuclear mitotic

81 apparatus protein (NuMA) recognizes minus-ends of microtubules and transports and  
82 crosslinks microtubules in cooperation with cytoplasmic dynein, a minus-end-directed  
83 motor, to focus spindle microtubules at the poles of mammalian cells [19-22]. The  
84 targeting protein for Xklp2 (TPX2) is required for spindle pole organization [23, 24] and  
85 stimulates microtubule nucleation in a Ran- and importin- $\alpha$ -regulated manner [25-27].  
86 Kinesin-14 HSET/XCTK2 cross-links both parallel and anti-parallel microtubules near  
87 chromosomes, but preferentially cross-links parallel microtubules near the spindle poles  
88 [28-30]. Hepatoma upregulated protein (HURP) accumulates on microtubules near  
89 chromosomes to form stabilized kinetochore-fibers (k-fibers) [31].

90 Most SAFs, including NuMA, TPX2, and HSET contain a nuclear localization  
91 sequence/signal (NLS) [28, 32, 33]. The NLS is specifically recognized by importin- $\alpha$ ,  
92 which forms hetero-dimer with importin- $\beta$  through an importin- $\beta$  binding (IBB) domain  
93 (Fig. 2A). On the other hand, some SAFs, such as HURP, are directly recognized by  
94 importin- $\beta$  (Fig. 2A) [31]. Because SAFs represent a small fraction of NLS-bearing  
95 nuclear proteins and need to be regulated effectively and selectively in mitosis, each  
96 SAF interacts with importins in specific ways to reduce competition with other nuclear  
97 proteins and SAFs [32, 33].

98 In mitotic human cells, NuMA localizes to the spindle poles and the polar cell  
99 cortex, where it facilitates spindle-pole focusing and astral microtubule capture/pulling,  
100 respectively [19, 20, 34]. Recent structural and *in vitro* studies have demonstrated that  
101 NuMA's microtubule-binding activities are inhibited by steric blockage of importin- $\beta$ ,  
102 mediated by importin- $\alpha$  [32], but this model has not been rigorously tested in cells. In  
103 addition, given that the Ran-GTP gradient diminishes with increasing distances from

104 chromosomes, it is unclear whether and how the Ran-GTP gradient activates NuMA at  
105 the spindle poles.

106 To precisely understand mechanisms and significance of Ran-based regulation  
107 of SAFs, it is critical to separate Ran's mitotic roles from its interphase  
108 nucleocytoplasmic transport function. To achieve this, we developed mitotic depletion  
109 assays for the Ran pathway in human cells by combining mitotic drugs with auxin-  
110 inducible degron (AID) technology [35], which allows us to degrade mAID-tag fusion  
111 proteins with a half-life of 20 min. In contrast to the prevailing model, we found that  
112 degradation of RCC1, RanGAP1, or importin- $\beta$  does not substantially affect localization  
113 and function of NuMA at the spindle poles, even if these proteins were degraded during  
114 mitosis. In sharp contrast, the Ran pathway polarizes both HURP and importin- $\beta$  on k-  
115 fibers near chromosomes, where HURP stabilizes k-fibers independently of importin- $\beta$ .  
116 Based on our results, we propose that the Ran-Importin pathway is required to activate  
117 SAFs specifically near chromosomes, but not generally, in human mitotic cells.

118

## 119 **Results**

### 120 **In human cells, NuMA focuses spindle microtubules at spindle poles using its C-** 121 **terminal conserved microtubule-binding domain**

122 NuMA functions in spindle microtubule focusing in cultured mammalian cells [19-22].  
123 Silk et al. demonstrated that NuMA's C-terminal microtubule-binding domain (MTBD1)  
124 adjacent to a NLS is required for spindle pole focusing in mouse fibroblasts [22] (Fig.  
125 1A). However, this domain is dispensable for spindle pole focusing in mouse  
126 keratinocytes [36]. In addition, NuMA has a second microtubule-binding domain  
127 (MTBD2) at the C-terminal end (Fig. 1A) [32, 37], which has stronger microtubule-  
128 binding activity and is sterically inhibited by importin- $\beta$  *in vitro* [32]. To understand which  
129 domain of NuMA is required for spindle pole focusing in mitotic human cells, we  
130 replaced endogenous NuMA with C-terminal truncation mutants in HCT116 cells (Fig.  
131 1A). Endogenous NuMA was visualized by integrating an mAID-mClover-FLAG (mACF)  
132 tag into both alleles of the NuMA gene [20]. NuMA-mACF was depleted using the auxin  
133 inducible degradation (AID) system following Dox and IAA treatment (S1A) [20, 35], and  
134 mCherry-tagged NuMA mutants were simultaneously expressed from the Rosa 26 locus  
135 by Dox treatment (Fig. 1B-C, S1B) [20]. Like endogenous NuMA, mCherry-tagged  
136 NuMA wild type (WT) accumulated in interphase nuclei (Fig. 1B) and at mitotic spindle  
137 poles (Fig. 1C #1) and was able to rescue pole-focusing defects caused by NuMA  
138 depletion (Fig. 1C-D #1). NuMA- $\Delta$ NLS mutants were unable to localize at nuclei in  
139 interphase (Fig. 1B, S1C), but were able to accumulate at spindle poles to rescue pole-  
140 focusing defects (Fig. 1C-D #2). As expected, NuMA  $\Delta$ C-ter mutants, which lack both  
141 MTBDs, diffused into the cytoplasm during metaphase (Fig. 1C #5), and were unable to

142 rescue the spindle-pole focusing defect (Fig. 1C-D #5). In contrast, NuMA  
143  $\Delta$ (NLS+MTBD2) mutants localized around spindle-poles to rescue the focusing defects  
144 (Fig. 1C-D #4). However, NuMA  $\Delta$ ex24 mutants, which lack NLS and the part of MTBD1  
145 containing the well-conserved NLM motif (Fig. S1D) [38, 39], were unable to fully rescue  
146 focusing defects, while localizing around the spindle-poles (Fig. 1C-D #3). These results  
147 indicate that NuMA's MTBD1, but not MTBD2, is essential for spindle pole focusing in  
148 human cells.

149

### 150 **NuMA localizes at the spindle poles and participates in spindle pole focusing** 151 **independently of RCC1**

152 NuMA's MTBD1 is located next to NLS, which is recognized by importin- $\alpha$  [32]. A recent  
153 study indicated that the importin- $\alpha/\beta$  complex sterically inhibits NuMA's microtubule-  
154 binding activity, but is released from NuMA by Ran-GTP *in vitro* [32] (Fig. 2A). To test  
155 this model in cells, we next depleted RCC1 (RanGEF) by integrating mAID-mClover  
156 (mAC) tag (Fig. 2B, S2A) [35]. In contrast to the model, NuMA accumulated normally  
157 around the spindle poles, and spindle microtubules were properly focused in RCC1-  
158 depleted cells (Fig. 2B, D, Fig. S2B-C), although metaphase spindle length diminished  
159 (Fig. 2B-C), and mitotic duration was slightly delayed (Fig. S2D-F).

160 To further analyze functions of NuMA in RCC1-depleted cells, we next co-  
161 depleted RCC1 and NuMA. Following treatment with Dox and IAA, both RCC1-mAC  
162 and NuMA-mAID-mCherry were degraded, and spindle microtubules were not properly  
163 focused (Fig. 2D-E, S2G-H). These results indicate that NuMA acts at spindle poles,  
164 even in the absence of Ran-GTP in human mitotic cells.



165

166 **Mitotic degradation of RCC1 does not affect localization and function of NuMA at**  
167 **spindle poles**

168 NuMA is transported into the nucleus during interphase (Fig. 1B) [32, 40], where it is  
169 likely released from importins by nuclear Ran-GTP. Because we found that NuMA is  
170 maintained in the nucleus following RCC1 degradation in interphase (Fig. S2E, t = -  
171 0:10), the majority of NuMA may already have been liberated from importins by RCC1  
172 before its degradation and may have been maintained in an active form in the nucleus,  
173 thereby producing no aberrant phenotypes in the subsequent mitosis in RCC1-depleted  
174 cells. To exclude this possibility, we next depleted RCC1 in nocodazole-arrested cells  
175 and analyzed the behavior of NuMA following nocodazole washout (For procedure, see  
176 Fig. S2I).

177 In RCC1-positive control cells, NuMA diffused into the cytoplasm during  
178 nocodazole arrest (Fig. 2F, t = -90), but rapidly accumulated near chromosome masses  
179 following nocodazole washout (Fig. 2F, t = 10). NuMA localized at the poles of  
180 metaphase spindles within 60 min (Fig. 2F, t = 60) and entered the nucleus following  
181 mitotic exit (Fig. 2F, t = 85). Importantly, NuMA accumulated similarly at focused spindle  
182 poles, even if RCC1 was degraded during nocodazole arrest. RCC1-mAC signals were  
183 initially detectable on chromosome masses during nocodazole-arrest (Fig. 2G, t = -90,  
184 arrow), but were reduced to undetectable levels after addition of IAA (Fig. 2G, t = 0).  
185 After nocodazole-washout, NuMA localized to focused spindle poles after ~60 min (Fig.  
186 2G, t = 55), as observed in control cells. Cells entered anaphase with timing similar to

187 that of control cells (Fig. S2J), but NuMA was not recruited to the nucleus after mitotic  
188 exit (Fig. 2G, t = 80).

189 As observed when RCC1 was degraded in asynchronous culture (Fig. 2C), the  
190 metaphase spindle became shorter when RCC1 was depleted during nocodazole-arrest  
191 (Fig. 2H). In addition, the metaphase spindle was not properly oriented to the attached  
192 culture dishes (Fig. 2I) Taken together, these results indicate that RCC1 participates in  
193 some fashion in spindle assembly in human mitotic cells, but is dispensable for NuMA  
194 localization and function at spindle poles, even if RCC1 is degraded during mitosis.

195

### 196 **NuMA localized at spindle poles is released from importins independently of Ran-** 197 **GTP**

198 Our results suggest that NuMA is liberated from importins in the absence of Ran-GTP  
199 (Fig. 3A). To confirm this, we next analyzed importin localization. Because importin- $\alpha$   
200 has several isoforms in human cells [41], we first examined localization of endogenous  
201 importin- $\beta$  in living cells by fusing it with mCherry (Fig. S3A). Unexpectedly, importin- $\beta$ -  
202 mCh accumulated on kinetochore-microtubules (k-fibers) near chromosomes, but not at  
203 metaphase spindle poles (Fig. 3B top). Although this is inconsistent with the reported  
204 spindle-pole localization of importin- $\beta$  [42], this result was confirmed by other  
205 visualization methods using a mAC tag and anti-importin- $\beta$  antibodies (Fig. S3B,C).  
206 Importantly, RCC1 depletion diminished importin- $\beta$  from k-fibers, but did not cause  
207 importin- $\beta$  accumulation at the spindle poles (Fig. 3B, bottom) where NuMA localized  
208 (Fig. 2B). This suggests that NuMA is released from importin- $\beta$  at the spindle poles,  
209 even in the absence of Ran-GTP (Fig. 3A).

210 To further test whether Ran-independent pathways exist for NuMA activation,  
211 we next analyzed localizations of importin- $\alpha$  wild type (WT) and  $\Delta$ IBB mutants, which  
212 lack the importin- $\beta$ -binding (IBB) domain. Importin- $\alpha$   $\Delta$ IBB mutants are insensitive to  
213 Ran-GTP due to the lack of an IBB domain, but are still able to interact with NuMA and  
214 partially inhibit NuMA's microtubule-binding activity *in vitro* (Fig. 3A) [32]. However,  
215 importin- $\alpha$   $\Delta$ IBB diffused into cytoplasm similarly to importin- $\alpha$  WT, and neither affected  
216 NuMA's spindle-pole localization nor colocalized with NuMA at the spindle poles in our  
217 experimental conditions (Fig. 3C, S3D). These results suggest that NuMA is released  
218 from the importin- $\alpha/\beta$  complex in a Ran-GTP-independent manner and that it localizes  
219 at spindle poles.

220

### 221 **Ran-GAP1 and importin- $\beta$ degradation do not affect NuMA localization and** 222 **function at spindle poles**

223 Although RCC1 depletion does not affect NuMA localization and functions, degradation  
224 of Ran-GAP1 or importin- $\beta$  may cause abnormal activation of NuMA throughout human  
225 cells, resulting in spindle assembly defects. To test this, we next degraded either Ran-  
226 GAP1 or importin- $\beta$  using AID technology (Fig. 3D-E). Ran-GAP1 degradation caused  
227 few mitotic phenotypes (Fig. 3D, S3E-I) and did not affect NuMA's spindle-pole  
228 localization (Fig. 3D bottom). Similarly, importin- $\beta$  degradation did not affect NuMA's  
229 localization and function at spindle poles (Fig. 3E bottom), although importin- $\beta$   
230 degradation caused short spindles and mitotic delay (Fig. S3J-N). These results indicate  
231 that Ran-dependent spatial regulation is dispensable for NuMA localization and function  
232 at spindle poles in cultured human cells.

233

234 **RCC1 regulates chromosome-proximal localization of HURP and HSET**

235 RCC1 depletion caused shorter mitotic spindles (Fig. 2B, C, F, H), suggesting that Ran-  
236 GTP serves some function in spindle assembly in human cells. To identify spindle  
237 assembly factors (SAFs) regulated by Ran-GTP, we next analyzed the localization of 3  
238 other major SAFs: TPX2, HSET, and HURP. mCherry-tagged TPX2 colocalized with  
239 SiR-tubulin signals in metaphase (Fig. 4A top, Fig. S4A), and its localization was  
240 virtually unaffected in RCC1-depleted cells (Fig. 4A bottom), as observed for NuMA  
241 (Fig. 2B). In contrast, mCherry-tagged HSET localized everywhere along spindle  
242 microtubules (Fig. 4B top, Fig. S4B) [30], and its spindle localization was selectively  
243 reduced near chromosomes following RCC1 depletion, although HSET still localized  
244 along spindle fibers farther away from chromosomes (Fig. 4B bottom). On the other  
245 hand, mCherry-tagged HURP accumulated at k-fibers near chromosomes, but localized  
246 weakly on spindle microtubules following RCC1 depletion (Fig. 4C and Fig. S4C). These  
247 results suggest that in human mitotic cells, the chromosome-derived Ran-GTP gradient  
248 regulates SAF localization preferentially near chromosomes, regardless of the presence  
249 of NLS (Fig. 4D).

250

251 **HURP, but not importin- $\beta$ , is required to stabilize k-fibers**

252 Importin- $\beta$  inhibits HURP's microtubule-binding activities by masking one of HURP's  
253 microtubule-binding domains (MTBD2) [43] (Fig. 5J). To understand the relationship  
254 between HURP and importin- $\beta$  for k-fiber localization and function, we next sought to

255 degrade endogenous HURP using AID (Fig. 5A and Fig. S5A-B). Endogenous HURP-  
256 mACF accumulated at k-fibers near chromosomes (Fig. 5A top), as observed with anti-  
257 HURP antibodies [31]. HURP depletion resulted in diminished importin- $\beta$  localization to  
258 k-fibers (Fig. 5A-B, S5C) and reduced mitotic spindle length (Fig. 5C). Because k-fibers  
259 are resistant to cold treatment [31], we next incubated cells with ice-cold medium for 20  
260 min and analyzed cold-stable microtubules. HURP localized to cold-stable microtubules  
261 (Fig. 5D, top), which were disrupted by HURP depletion (Fig. 4D bottom), consistent  
262 with a previous study [31].

263 We next depleted importin- $\beta$  and analyzed effects of this depletion on HURP and  
264 k-fibers (Fig. 5E, S5D). Importin- $\beta$  depletion caused a remarkable re-localization of  
265 HURP from k-fibers near chromosomes to spindle microtubules (Fig. 5E-F). Although k-  
266 fiber localization of HURP was unclear in importin- $\beta$ -depleted cells due to the relatively  
267 strong accumulation of HURP on spindle microtubules around spindle poles (Fig. 5E  
268 bottom), HURP was clearly detected on cold-stable k-fibers in importin- $\beta$ -depleted cells  
269 (Fig. 5G bottom). These results suggest that HURP acts in k-fiber stabilization,  
270 independently of importin- $\beta$ .

271

## 272 **HURP and importin- $\beta$ localize throughout the spindle in RanGAP1-depleted cells**

273 Whereas HURP and importin- $\beta$  have different roles in k-fiber stabilization (Fig. 5D, G),  
274 both proteins accumulate at k-fibers near chromosomes downstream of RCC1 (Fig. 3B,  
275 4C). To better understand mechanisms of Ran-based spatial regulation of HURP and  
276 importin- $\beta$ , we next analyzed behavior of HURP and importin- $\beta$  in RanGAP1-depleted  
277 cells, in which Ran-GTP should exist throughout cells. Interestingly, both HURP and

278 importin- $\beta$  localized throughout the spindle with increased intensities in RanGAP1-  
279 depleted cells (Fig. 5H-I, S5E). These results suggest that HURP and importin- $\beta$  act  
280 together and interact with microtubules preferentially in the presence of Ran-GTP (Fig.  
281 5J).

282

### 283 **HURP dynamically associates with k-fibers in the presence of importin- $\beta$ .**

284 Based on our results, we developed a local cycling model for activation and polarization  
285 of HURP (Fig. 5J). In this model, importin- $\beta$  inhibits HURP globally, including at k-fibers,  
286 by masking HURP's 2<sup>nd</sup> microtubule-binding domain (MTBD2). The resulting HURP-  
287 importin- $\beta$  complex binds weakly to microtubules through HURP's MTBD1 [43], but the  
288 Ran-GTP gradient locally releases importin- $\beta$  from HURP, resulting in full activation of  
289 HURP near chromosomes (Fig. 5J). To test this model, we first performed fluorescence  
290 recovery after photobleaching (FRAP) for HURP, and analyzed its dynamics on spindle  
291 microtubules in the presence and absence of importin- $\beta$ . In control cells, HURP was  
292 quickly recovered at k-fibers after bleaching (Fig. 6A top, 6B black, S6A  $t_{1/2} = 20.5$  sec).  
293 In contrast, HURP's fluorescent signals were hardly seen on the spindle in importin- $\beta$ -  
294 depleted cells (Fig. 6A bottom, 6B red, S6B). These results indicate that HURP  
295 dynamically associates with k-fibers in the presence of importin- $\beta$ , whereas HURP binds  
296 tightly to spindle microtubules in the absence of importin- $\beta$ .

297

### 298 **HURP is dynamically maintained at k-fibers during metaphase**

299 mAID-tag fusion proteins can be rapidly degraded with a half-life of 20 min [35]. To  
300 confirm the dynamic regulation of HURP by importin- $\beta$  and Ran-GTP, we next sought to  
301 degrade importin- $\beta$  during metaphase by combining AID-mediated degradation with  
302 APC/C inhibitors [44] (Fig. 6C). Following treatment with the APC/C inhibitors, Apcin  
303 and proTAME, cells arrested at metaphase, in which both importin- $\beta$  and HURP  
304 accumulated at k-fibers near chromosomes (Fig. 6 D, t = 0). Importantly, importin- $\beta$ -  
305 mAC signals diminished to undetectable levels 60-90 min after addition of IAA (Fig. 6D,  
306 arrows), and HURP relocated from k-fibers to spindle microtubules in response to the  
307 reduction of importin- $\beta$  signals (Fig. 6D, E).

308 To confirm these results, we next acutely degraded RCC1 in metaphase-arrested  
309 cells. As with importin- $\beta$  degradation, HURP dissociated from k-fibers and localized  
310 weakly on the spindle in response to degradation of RCC1 (Fig. 7A, B). Unexpectedly,  
311 in contrast to the prometaphase degradation assay (Fig. 2H), spindle length appeared  
312 normal when RCC1 was degraded in the metaphase-arrested condition (Fig. 7C).  
313 Together, these results indicate that HURP is dynamically maintained at k-fibers near  
314 chromosomes by the Ran-Importin pathway, even in metaphase, but HURP is critical for  
315 spindle length regulation primarily during prometaphase.

316

317

318

319 **Discussion**

320 **NuMA is liberated from importins independently of Ran-GTP for spindle-pole**  
321 **focusing in human mitotic cells**

322 In contrast to the prevailing model (Fig. 2A), we demonstrated that the Ran-Importin  
323 pathway is dispensable for localization and functions of NuMA at the spindle poles in  
324 human HCT116 cells (Fig. 2, 3, 7D right). This is consistent with the recent observation  
325 that NuMA is less sensitive to Ran-GTP level than to HSET/XCTK2 [29]. Although we  
326 do not exclude the possibility that Ran-GTP liberates NuMA from importin- $\alpha/\beta$   
327 complexes near chromosomes, we favor the idea that parallel pathways exist to activate  
328 NuMA in mitotic human cells. In fact, recent studies indicate that importin- $\alpha/\beta$ -binding  
329 TPX2 can be activated not only by Ran-GTP, but also by Golgi- or palmitoylation-  
330 dependent sequestration of importin- $\alpha$  [45, 46]. In addition, mitotic spindles contain  
331 centrosomes, which may generate special signals that liberate NuMA from inhibitory  
332 importins (Fig. 7D). Interestingly, NuMA is broadly distributed on a bundle-like structure  
333 between the poles in human acentrosomal cells [47]. It is necessary to analyze whether  
334 NuMA is preferentially regulated by Ran-GTP in acentrosomal cells, especially in  
335 oocytes, where Ran-GTP governs meiotic spindle assembly [12].

336         Although NLS-containing SAFs are recognized by importin- $\alpha$ , structural studies  
337 indicate that importin- $\alpha$  binds to NuMA and TPX2 with slightly different binding patches  
338 [32]. In addition, whereas TPX2-NLS and NLS-binding sites of importin- $\alpha$  are well  
339 conserved in vertebrates, NLS of NuMA is not well conserved in fish (Fig. S1D-F).  
340 Furthermore, NLS is lacking in other NuMA-like proteins in lower eukaryotes, such as  
341 *Caenorhabditis elegans* LIN-5, *Drosophila* Mud, and yeast Num1 [38, 48, 49],



342 suggesting that NuMA acquired NLS in higher animals and is likely to be regulated  
343 differently than TPX2. Future research should be undertaken to understand how the  
344 NuMA-importin interaction is regulated in a Ran-independent manner, and why NLS-  
345 dependent regulation of NuMA was acquired in higher animals.

346

347 **The Ran-Importin pathway locally activates and polarizes HURP by promoting its**  
348 **microtubule binding-dissociation cycle near chromosomes**

349 In contrast to NuMA, we demonstrated that HURP is preferentially regulated by the  
350 Ran-Importin pathway in mitotic human cells (Fig. 4C, 5E, H). Although HURP has been  
351 identified previously as a downstream target of Ran-GTP [31], we unexpectedly found  
352 that HURP also colocalizes with importin- $\beta$  on k-fibers near chromosomes (Fig. S3C,  
353 Fig. 5A, E), and stabilizes k-fibers independently of importin- $\beta$  (Fig. 5D, G). In addition,  
354 HURP's spindle distribution is sensitive to levels of Ran-GTP and importin- $\beta$  (Fig. 4C,  
355 5E, H), and is dynamically and spatially maintained during metaphase in a Ran-  
356 pathway-dependent manner (Fig. 6A, B, D, 7A). Based on these results, we propose a  
357 local cycling model for establishment and maintenance of HURP's polarized localization  
358 to spindle microtubules (Fig. 5J, 7D left). After nuclear envelope breakdown (NEBD),  
359 HURP strongly interacts with microtubules through its two microtubule-binding domains  
360 (MTBD1 and MTBD2 in Fig. 5J) [31, 43]. Since importin- $\beta$  is localized diffusely  
361 throughout cells (Fig. 3E, 5E), it binds to HURP on microtubules, and then dissociates  
362 HURP from the microtubules by masking HURP's MTBD2 domain [43]. However, in the  
363 vicinity of chromosomes, Ran-GTP releases HURP from importin- $\beta$  [31], and the  
364 liberated HURP interacts strongly with microtubules around chromosomes. By repeating

365 this local binding-dissociation cycle, HURP, but not importin- $\beta$ , stabilizes microtubules  
366 and generates stable k-fibers near chromosomes (Fig. 5D, G). This dynamic regulation  
367 is similar to that of HSET/XCTK2 [50] and would be suitable for bundling short  
368 microtubules around kinetochores during prometaphase [51] and for coupling HURP's  
369 polarized localization with microtubule flux on the metaphase spindle.

370

### 371 **RCC1 is required to define proper spindle length during prometaphase**

372 RCC1 depletion causes shortened bipolar spindles in human cells (Fig. 2B, C, F, H).  
373 This is probably due to multiple defects in spindle assembly processes, including the  
374 lack of HURP-based k-fiber formation (Fig. 5C, D) and HSET-dependent microtubule-  
375 sliding (Fig. 4B) [28]. Intriguingly, our mitotic degradation assays indicate that Ran-GTP  
376 controls spindle length primarily during prometaphase, rather than in metaphase (Fig.  
377 2H, 7C). Once metaphase spindles are assembled, other k-fiber localized proteins, such  
378 as clathrin, TACC3, and ch-TOG [52], may be able to maintain bundled-k-fibers during  
379 metaphase in a Ran-independent manner.

380 In addition, our mitotic degradation assay revealed that RCC1-depletion does  
381 not affect mitotic progression (Fig. S2J). This suggests that the mitotic delay observed  
382 in RCC1 depletion in asynchronous culture (Fig. S2F) is a secondary defect caused by  
383 loss of interphase RCC1 activity. In fact, ectopically expressed HSET-NLS mutants  
384 localize in cytoplasm and causes abnormal cytoplasmic microtubule-bundling in  
385 interphase [30]. Numerous similar defects would be created by RCC1 depletion in  
386 interphase and would affect subsequent mitotic progression.

387

388 **A new toolkit and mitosis-specific degradation assays to dissect mitotic roles of**  
389 **the Ran-importin pathway**

390 As discussed above, mitotic inactivation is critical to precisely analyze mitotic functions  
391 of Ran-GTP and importins. Previously, tsBN2, a temperature-sensitive RCC1 mutant  
392 hamster cell line [53, 54] and a small molecule inhibitor, importazole [55], have been  
393 developed to acutely inhibit functions of RCC1 and importin- $\beta$ , respectively. Here, we  
394 established three human AID-cell lines for RCC1, RanGAP1, and importin- $\beta$  [35], and  
395 succeeded in degrading RCC1 and importin- $\beta$  specifically in prometaphase (Fig. 2C-F)  
396 or metaphase (Fig. 6C-E, 7A-B). Because these AID-cell lines and mitotic degradation  
397 assays are applicable to other Ran-regulated SAFs/cortical proteins [4, 54, 56] and  
398 other multi-functional proteins such as dynein and NuMA [20, 35], respectively, these  
399 toolkits and assays will further advance our understanding of mechanisms and roles of  
400 spindle assembly, maintenance, and positioning in animal cells.

401

402 **Acknowledgments**

403 We thank Iain M. Cheeseman for critical reading of the manuscript, and Yuki Tsukada,  
404 Rie Inaba and Kiyoko Murase for technical assistance. This work was supported by  
405 grants from the PRESTO program (JPMJPR13A3) of the Japan Science and  
406 Technology agency (JST) for T.K, a Career Development Award of the Human Frontier  
407 Science Program (CDA00057/2014-C) for T.K., KAKENHI (16K14721 and 17H05002  
408 for T.K, 17H01431 for G.G.) of the Japan Society for Promotion of Science (JSPS),  
409 NIG-JOINT (2014B-B-3, 2015-A1-19, 2016-A1-22 for T.K.) of National Institute of  
410 Genetics (NIG), the Naito Foundation for T.K, and JSPS and DFG under the Joint  
411 Research Projects-LEAD with UKRI for G.G.

412

413

414 **Author contributions**

415 Conceptualization, TK; Investigation, TK, KT, HH, MN, and MO; Formal analysis, TK  
416 and KT; Methodology, TK, YS, and MK; Writing, TK; Supervision, TK and GG; Funding  
417 Acquisition, TK and GG.

418

419 **Declaration of interests**

420 The authors declare no competing interests.

421

422

## 423 Figure Legends

424

425 **Figure 1. NuMA acts in spindle pole focusing using its conserved microtubule-**  
426 **binding domain in human cells.** (A) Full length NuMA and tested NuMA truncation  
427 fragments. NLS and a microtubule-binding domain (MTBD) are shown in magenta and  
428 green, respectively. (B and C) Interphase (B) and metaphase (C) Metaphase NuMA-  
429 mACF cell lines showing live fluorescent images of NuMA-mACF, NuMA-mCh WT or  
430 mutants, SiR-DNA and SiR-700 tubulin (TUB) after 24 hr following treatment with Dox  
431 and IAA. Arrows in C indicate unfocused microtubules. (D) Quantification of cells with  
432 unfocused spindles in each condition from data in (C). Bars indicate means  $\pm$  SEMs. N  
433 = 47 (-/-), 75 (-/+), 31 (#1/+), 30 (#2/+), 31 (#3/+), 30 (#4/+), and 48 (#5/+) from 3  
434 independent experiments. p-values calculated using Dunnett's multiple comparisons  
435 test after one-way ANOVA ( $F(3,6) = 33.81, p = 0.0004$ ).

436

437 **Figure 2. NuMA functions in spindle pole focusing independently of RCC1.** (A)  
438 The prevailing model of SAF inhibition and activation by importins and Ran-GTP. (B)  
439 Metaphase RCC1-mAC cells showing live fluorescent images of RCC1-mAC, NuMA-  
440 mCherry (mCh), and SiR-TUB after 24 hr following Dox and IAA treatment. (C)  
441 Scatterplots of the ratio of spindle length and cell diameter in controls ( $0.54 \pm 0.04, n =$   
442  $32$ ) and RCC1-depleted ( $0.47 \pm 0.04, n = 23$ ) cells. Bars indicate means  $\pm$  SDs from  $>3$   
443 independent experiments. \* indicates statistical significance according to Welch's *t*-test  
444 ( $p < 0.0001$ ). (D) Quantification of cells with unfocused spindles in each condition from  
445 data in (C) and (E). Bars indicate means  $\pm$  SEMs. N = 27, 34, 37, and 113 from  $>4$   
446 independent experiments. p-values calculated using Dunnett's multiple comparisons  
447 test after one-way ANOVA ( $F(3,14) = 36.40, p < 0.0001$ ). \* indicates  $p < 0.0001$ . (E)  
448 Live fluorescent images of SiR-DNA, RCC1-mAC, NuMA-mAID-mCherry, and SiR700-  
449 TUB in RCC1-mAC and NuMA-mAID-mCh double knock-in cells following 24 hr of Dox  
450 and IAA treatment. Two cells with or without RCC1 and NuMA signals were analyzed in  
451 the same field. Eight z-section images were acquired using  $1.0\text{-}\mu\text{m}$  spacing. Maximum  
452 intensity projection images are shown. (F, G) Live fluorescent images of RCC1-mAC  
453 and NuMA-mCh in RCC1-positive control (F) and RCC1-negative cells (G) treated with  
454 nocodazole and IAA, as described in Fig. S2I. \* indicates RCC1-undegraded cells. (H)  
455 Scatterplots of the ratio of spindle length and cell diameter in control ( $0.57 \pm 0.05, n =$   
456  $35$ ) and RCC1-depleted ( $0.50 \pm 0.06, n = 30$ ) cells. Bars indicate means  $\pm$  SDs from  $>3$   
457 independent experiments. \* indicates statistical significance according to Welch's *t*-test  
458 ( $p < 0.0001$ ). (I) Quantification of spindle orientation on the x-z plane in control ( $n = 43$ )  
459 and RCC1-depleted ( $n = 42$ ) cells from 2 independent experiments. See Methods for  
460 the definition of parallel and tilted orientations. \* indicates statistical significance  
461 according to Z-test (significance level 0.1). Scale bars =  $10\ \mu\text{m}$ .

462

463 **Figure 3. NuMA is liberated from importins at spindle poles independently of Ran-**  
464 **GTP.** (A) A model showing NuMA liberation from importins in RCC1 depleted cells. (B)  
465 Metaphase RCC1-mAC cells showing live fluorescent images of RCC1-mAC, importin-  
466  $\beta$ -mCh, and SiR-TUB and after 24 hr following treatment with Dox and IAA. Right:

467 Quantification of cells with k-fiber localization of importin- $\beta$  in control ( $n > 40$ ) and  
468 RCC1-depleted ( $n > 40$ ) cells from 3 independent experiments. \* indicates statistical  
469 significance according to Z-test (significance level 0.0001). (C) Live fluorescent images  
470 of NuMA-mClover-FLAG (mCF, left) and importin- $\alpha$  (right) wild type (WT, top) and a  
471  $\Delta$ IBB mutant (bottom). (D-E) Metaphase RanGAP1-mAC (D) and importin- $\beta$ -mAC (E)  
472 cells showing live fluorescent images of NuMA-mCherry (mCh), SiR-tubulin (SiR-TUB),  
473 and RanGAP1-mAC (D) or importin- $\beta$ -mAC (E) after 24 hr following treatment with Dox  
474 and IAA. \* in E indicates cells with importin- $\beta$  signals in the presence of Dox and IAA.  
475 Scale bars = 10  $\mu$ m.

476

477 **Figure 4. RCC1 regulates chromosome-proximal localization of HURP and HSET.**

478 (A-C) Left: Metaphase RCC1-mAC cells showing live fluorescent images of RCC1-  
479 mAC, SiR-TUB and TPX2-mCh (A), mCh-HSET (B), and HURP-mCh (C) after 24 hr  
480 following treatment with Dox and IAA. Right: Quantification of throughout spindle or k-  
481 fiber localization of HSET or HURP in control ( $n > 30$ ) and RCC1-depleted ( $n > 40$ ) cells  
482 from 2 or 3 independent experiments. \* indicates statistical significance according to Z-  
483 test (significance level 0.0001). (D) A list summarizing localization of SAFs in control  
484 and RCC1-depleted cells. Scale bars = 10  $\mu$ m.

485

486 **Figure 5. HURP, but not importin- $\beta$ , is required to stabilize k-fibers.**

487 (A) Metaphase HURP-mACF cells showing live fluorescent images of HURP-mACF, importin- $\beta$ -mCh  
488 and SiR-TUB after 24 hr following Dox and IAA treatment. (B) Quantification of k-fiber  
489 localization of importin- $\beta$  in control ( $n = 49$ ) and HURP-depleted ( $n = 46$ ) cells from 3  
490 independent experiments. (C) Scatterplots of the ratio of spindle length and cell  
491 diameter in control ( $0.64 \pm 0.05$ ,  $n = 49$ ) and HURP-depleted ( $0.52 \pm 0.06$ ,  $n = 43$ ) cells.  
492 \* indicates statistical significance according to Welch's  $t$ -test ( $p < 0.0001$ ). (D)  
493 Fluorescent images of HURP-mACF, TUB, and DNA (Hoechst 33342 staining) in  
494 metaphase fixed cells treated with ice-cold medium for 20 min. Two cells with or without  
495 HURP signals were analyzed in the same field. (E) Metaphase importin- $\beta$ -mAC cells  
496 showing live fluorescent images of importin- $\beta$ -mAC, HURP-SNAP and SiR-TUB after 24  
497 hr following treatment with Dox and IAA. (F) Quantification of spindle localization of  
498 HURP in control ( $n = 49$ ) and importin- $\beta$ -depleted ( $n = 43$ ) cells from 3 independent  
499 experiments. (G) Fluorescent images of importin- $\beta$ -mAC, HURP-SNAP, TUB, and DNA  
500 (Hoechst 33342 staining) in metaphase fixed cells treated with ice-cold medium for 20  
501 min. Five z-section images were obtained using 0.5- $\mu$ m spacing and maximum intensity  
502 projection images are shown in (D) and (G). (H-I) Left: metaphase RanGAP1-mAC cells  
503 showing live fluorescent images of RanGAP1-mAC, SiR-TUB and HURP-mCh (H) or  
504 importin- $\beta$ -mCh (I) after 24 hr following Dox and IAA treatment. Right: quantification of  
505 k-fiber localization of HURP or importin- $\beta$  in control ( $n = 45$ ) and RanGAP1-depleted ( $n$   
506  $> 45$ ) cells from 3 independent experiments. \* in (B), (F), (H) and (I) indicates statistical  
507 significance according to Z-test (significance level 0.0001). (J) A local cycling model of  
508 HURP on k-fibers regulated by Ran-GTP and importin- $\beta$ . See text for details. Scale bars  
509 = 10  $\mu$ m.

510

511 **Figure 6. HURP dynamically accumulates on metaphase k-fibers in an importin- $\beta$ -**  
512 **dependent manner.** (A) Live fluorescent images of HURP-SNAP visualized with TMR-  
513 star (magenta) and SiR-tubulin (TUB) in control (top) and importin- $\beta$ -depleted cells  
514 (bottom). Fluorescent signals were bleached in the indicated box region at  $t = 0$ , and the  
515 fluorescence recoveries were monitored for 120 sec. (B) A graph showing fluorescence  
516 recovery after photobleaching. An average of 7 samples was plotted. Bars indicate SDs.  
517 (C) Schematic diagram of the metaphase degradation assay. Following release from  
518 RO-3336-mediated G2 arrest, proTAME and Apcin were added to arrest cells in  
519 metaphase. Auxin (IAA) was added (indicated by the red line) to induce RCC1  
520 degradation during metaphase. (D) Live fluorescent images of SiR-DNA, importin- $\beta$ -  
521 mAC, HURP-mCh, and SiR-700-tubulin (TUB). IAA was added at  $t = 0$ . Arrows indicate  
522 a cell showing a reduction of importin- $\beta$  signal during metaphase. (E) Enlarged images  
523 from (D) showing a re-localization of HURP-mCh from k-fibers ( $t = 0$ ) to the spindle ( $t$   
524  $=90$ ). Scale bars = 10  $\mu\text{m}$ .

525

526 **Figure 7. Models of local activation mechanisms for HURP and NuMA in mitosis.**  
527 (A) Live fluorescent images of SiR-DNA, RCC1-mAC, HURP-mCh, and SiR-700-tubulin  
528 (TUB). IAA was added at  $t = 0$ . (B) Enlarged images of indicated regions in (A) showing  
529 a reduction of HURP-mCh from k-fibers in response to degradation of RCC1. (C)  
530 Spindle length measurement ( $n = 6$ ) at  $t = -5$  and 60 min in (A). (D) Left: in the vicinity of  
531 chromosomes, Ran-GTP and importin- $\beta$  promote the microtubule binding and  
532 dissociation cycle of HURP, resulting in polarized HURP accumulation and stable k-fiber  
533 formation. Right: chromosome-derived Ran-GTP is not required to activate NuMA at the  
534 spindle poles in mitotic human cells. A Ran-independent, parallel pathway would exist to  
535 activate NuMA away from chromosomes. See text for details. Scale bars = 10  $\mu\text{m}$ .

536

537



## 538 **Materials and Methods**

539  
540  
541  
542  
543  
544  
545  
546  
547  
548  
549  
550  
551  
552  
553  
554  
555  
556  
557  
558  
559  
560  
561  
562  
563  
564  
565  
566  
567  
568  
569  
570  
571  
572  
573  
574  
575  
576  
577  
578  
579  
580  
581  
582  
583

- **Plasmid Construction**

Plasmids for CRISPR/Cas9-mediated genome editing and auxin-inducible degenon were constructed according to protocols of Natsume et al. [35] and Okumura et al., [20]. To construct donor plasmids containing homology arms for RCC1 (~500-bp homology arms), RanGAP1 (~500-bp), importin- $\beta$  (~500-bp), HURP (~200-bp), TPX2 (~200-bp), and HSET (~200-bp), gene synthesis services from Eurofins Genomics K.K. (Tokyo, Japan) or Genewiz (South Plainsfield, NJ) were used. Plasmids and sgRNA sequences used in this study are listed in Supplementary Tables S1 and S2, and will be deposited in Addgene.

- **Cell Culture, Cell Line Generation, and Antibodies**

HCT116 cells were cultured as described previously [20]. Knock-in cell lines were generated according to procedures described in Okumura et al. [20]. To activate auxin-inducible degradation, cells were treated with 2  $\mu$ g/mL Dox and 500  $\mu$ M indoleacetic acid (IAA) for 20–24 hr. Cells with undetectable signals for mAID-fusion proteins were analyzed. Flip-In T-REx 293 cells were used in Figure 3C to express mCherry-tagged importin- $\alpha$  constructs. Cell lines were created according to procedures described in Kiyomitsu et al. [57]. To induce transgenes, cells were incubated with 1  $\mu$ g/mL tetracycline (MP Biomedicals). Cell lines and primers used in this study are listed in Tables S1 and S3, respectively.

Antibodies against tubulin (DM1A, Sigma-Aldrich, 1:2,000), NuMA (Abcam, 1:1,000), RCC1 (Cell Signaling Technology, D15H6, Rabbit mAb, 1:100), RanGAP1 (Santa Cruz Biotechnology, H-180, 1:200), importin- $\beta$  (GeneTex, 3E9 Mouse mAb, 1:100), and HURP (E. Nigg laboratory, 1 : 200) were used for western blotting. For RCC1 immunoblots, membranes were incubated with anti-RCC1 antibody overnight at 4 °C.

- **Microscope System**

Imaging was performed using spinning-disc confocal microscopy with a 60 $\times$  1.40 numerical aperture objective lens (Plan Apo  $\lambda$ , Nikon, Tokyo, Japan). A CSU-W1 confocal unit (Yokogawa Electric Corporation, Tokyo, Japan) with five lasers (405, 488, 561, 640, and 685 nm, Coherent, Santa Clara, CA) and an ORCA-Flash 4.0 digital CMOS camera (Hamamatsu Photonics, Hamamatsu City, Japan) were attached to an ECLIPSE Ti-E inverted microscope (Nikon) with a perfect focus system. DNA images in Figure 2A/B or Figure 4D/G were obtained using either a SOLA LED light engine (Lumencor, Beaverton, OR) or a 405-nm laser, respectively.

- **Immunofluorescence and Live Cell Imaging**

For immunofluorescence in Figure S1K, HURP-mACF cells were fixed with PBS containing 3% paraformaldehyde and 2% sucrose for 10 min at room temperature. Fixed cells were permeabilized with 0.5% Triton X-100™ for 5 min on ice, and pretreated with PBS containing 1% BSA for 10 min at room temperature after washing with PBS. Importin- $\beta$  was visualized using anti-importin- $\beta$  antibody (1:500). Images of multiple z-sections were acquired by spinning-disc confocal microscopy using 0.5- $\mu$ m



584 spacing and camera binning 2. Maximally projected images from 3 z-sections are  
585 shown.

586 For live cell imaging, cells were cultured on glass-bottomed dishes  
587 (CELLview™, #627860 or #627870, Greiner Bio-One, Kremsmünster, Austria) and  
588 maintained in a stage-top incubator (Tokai Hit, Fujinomiya, Japan) to maintain the  
589 same conditions used for cell culture (37° C and 5% CO<sub>2</sub>). In most cases, three to five  
590 z-section images using 0.5-µm spacing were acquired and single z-section images  
591 are shown, unless otherwise specified. Microtubules were stained with 50 nM SiR-  
592 tubulin or SiR700-tubulin (Spirochrome) for >1 hr prior to image acquisition. DNA was  
593 stained with 50 ng/mL Hoechst® 33342 (Sigma-Aldrich) or 20 nM SiR-DNA  
594 (Spirochrome) for > 1 hr before observation. To visualize SNAP-tagged HURP in Fig.  
595 4E, cells were incubated with 0.1 µM TMR-Star (New England BioLabs) for > 2 hr, and  
596 TMR-Star were removed before observation. To optimize image brightness, the same  
597 linear adjustments were applied using Fiji and Photoshop.

598  
599 • Prometaphase degradation assay and nocodazole washout  
600 To degrade mAID-tagged proteins during nocodazole arrest, cells were treated with 2  
601 µg/mL Dox and 3.3 µM nocodazole at the indicated times (Fig. 2C). Five hours after  
602 addition of nocodazole, cell culture dishes were moved to the stage of a microscope  
603 equipped with a peristaltic pump (SMP-21S, EYELA, Tokyo Rikakikai). Two z-section  
604 images were acquired using 2-µm spacing at three different (X,Y) positions and at 5-  
605 min intervals, with 500 µM IAA added during the first interval. After 90 min, the  
606 nocodazole-containing medium was completely replaced with fresh medium using the  
607 peristaltic pump at a velocity of 20 sec/mL for 15 min. Images were acquired for a  
608 further 2 hr and maximum intensity projection images are shown in Figure 2D-F. To  
609 analyze spindle orientation in Figure 2I, we took five z-section images using 2-µm  
610 spacing. When both spindle poles are included within three z-section images, we  
611 judged the spindle as having parallel orientation.

612  
613 • Metaphase degradation assay  
614 To degrade mAID-tagged proteins in metaphase-arrested cells, cells were treated with  
615 50 µM Apcin (I-444, Boston Biochem) and 20 µM proTAME (I-440, Boston Biochem)  
616 at the indicated times (Fig. 5A). Three z-section images were acquired using 1-µm  
617 spacing at six different (X,Y) positions and at 5-min intervals, with 500 µM IAA added  
618 during the first interval. Maximum intensity projection images are shown in Figure 5B.

619  
620 • Cold treatment assay  
621 To increase the number of cells in metaphase, cells were treated with 20 µM MG132  
622 (C2211, Sigma-Aldrich) for 90 min. To visualize SNAP-tagged HURP (Fig. 4G), cells  
623 were incubated with 0.1 µM TMR-Star (S9105S, New England BioLabs) for at least  
624 30 min. Before fixation, cells were incubated in ice-cold medium for 20 min [31] to  
625 depolymerize non-kinetochore microtubules.

626  
627 • FRAP  
628 FRAP was conducted with a microscope (LEM 780, Carl Zeiss MicroImaging, Inc.),  
629 using a 63 x objective lens. Images were acquired every 5 sec before and after

630 photobleaching. The bleached area (BA) was set as it covers half spindle and  
631 illuminated at  $t = 0$  using 560 nm laser (20 mW) with the following setting: speed 4.0  
632 and iteration 1. Metaphase cells that orient parallel to the bottom cover-glass were  
633 selected. HURP (TMR-Star) intensity of BA was normalized using the intensity of non-  
634 bleached area (NBA) that covers the remaining half spindle. Corrected relative  
635 intensity at time  $t_n$  was calculated as  $(BA_n - BG_n) / (BA_{-1} - BG_{-1}) \times (NBA_{-1} - BG_{-1}) /$   
636  $(NBA_n - BG_n)$ , where  $t = -1$  represents the first time point of image acquisition before  
637 bleaching. BG means background [58]. Curve fitting and analyses shown in Fig. S6  
638 were performed using Fiji.

639

640 • Statistical Analysis

641 To determine the significance of differences between the mean values obtained for  
642 two experimental conditions, Welch's  $t$ -tests (Prism 6; GraphPad Software, La Jolla,  
643 CA) or a Z-test for proportions ([epitools.ausvet.com.au/ztesttwo](http://epitools.ausvet.com.au/ztesttwo)) were used, as  
644 indicated in figure legends.

645

646 **Supplemental Information**

647

648 **Supplemental Figure Legends**

649 **Figure S1. Generation of cell lines that conditionally degrade endogenous NuMA**

650 **and express NuMA mutants.** (A) Schematic of the auxin-inducible degradation (AID)  
651 system. OsTIR1, an F-box protein expressed following Dox treatment, forms SCF E3  
652 ubiquitin ligase complexes. Following auxin (IAA) treatment, mAID-fusion protein was  
653 poly-ubiquitinated by SCF<sup>OsTIR1</sup> and degraded by proteasomes with a half-life of ~20  
654 min. (B) Genomic PCR showing clone genotypes after hygromycin (Hygro) selection.  
655 Clones used in this study are listed in Table S1. (C) Interphase NuMA-mACF cell lines  
656 showing live fluorescent images of NuMA-mACF, NuMA-mCh mutants, and SiR-DNA  
657 after 24 hr following treatment with Dox and IAA. Endogenous NuMA-mACF signals  
658 were undetectable, whereas ectopically expressed NuMA mutants were detected in  
659 cytoplasm. NuMA-mCh  $\Delta$ (NLS+MTBD2) appeared to accumulate on microtubules  
660 around centrosomes. (D) Amino acid sequence alignment of the NLS of NuMA proteins  
661 in *H. sapiens* (NP\_006176), *R. norvegicus* (NP\_001094161), *M. musculus*  
662 (NP\_598708), *G. gallus* (NP\_001177854), *X. laevis* (NP\_001081559), *D. rerio*  
663 (NP\_001316910), *O. latipes* (XP\_020564048), and *A. ocellaris* (XM\_023273896)  
664 aligned by ClustalWS. NLSs are not well conserved in fish, although NuMA clustering  
665 motif (shown in orange) and NLM motif (sky blue) are highly conserved in vertebrates.  
666 In the NLS alignment, key amino acids that interact with importin- $\alpha$  [32] are boxed in  
667 red, whereas positively charged amino acids in fish are boxed in green. (E) Amino acid  
668 sequence alignment of the major (i) and minor (ii) NLS-binding site of importin- $\alpha$   
669 proteins in *H. sapiens* (NP\_001307540), *M. musculus* (NP\_034785), *G. gallus*  
670 (NP\_001006209), *X. laevis* (NP\_001080459), *D. rerio* (NP\_001002335), and *O. latipes*  
671 (XP\_023816136) aligned by ClustalWS. (F) Amino acid sequence alignment of the NLS  
672 of TPX2 proteins in *H. sapiens* (NP\_036244), *M. musculus* (NP\_001135447), *G. gallus*  
673 (NP\_989768), *X. laevis* (AAH68637), *D. rerio* (NP\_001314674), and *O. latipes*  
674 (XP\_020557297) aligned by ClustalWS. Key amino acids interact with importin- $\alpha$  [33]  
675 are boxed in red.

676

677 **Figure S2. Generation of cell lines for auxin-inducible degradation of endogenous**

678 **RCC1.** (A) Genomic PCR showing clone genotypes after neomycin (Neo) selection.  
679 Clone No.1 was used as a parental cell in subsequent selections. \* indicates a non-  
680 specific band. (B) Genomic PCR showing clone genotypes after hygromycin (Hygro)  
681 selection. Clone No.1 was used in this study. (C) Immunoblotting for anti-NuMA, anti-  
682 RCC1, and anti- $\alpha$ -tubulin (TUB, loading control) showing bi-allelic insertion of the  
683 indicated tags. (D-E) Live fluorescent images of DNA (Hoechst 33342 staining), RCC1-  
684 mAC, NuMA-mCh, and SiR-TUB in control (D) and RCC1-depleted (E) cells. (F)  
685 Scatterplots of mitotic duration (NEBD to anaphase onset) in control ( $34.1 \pm 7.6$ , n=32)  
686 and RCC1-depleted cells ( $47.2 \pm 10.5$ , n=27). Bars indicate means  $\pm$  SDs from >3  
687 independent experiments. \* indicates statistical significance according to Welch's *t*-test  
688 ( $p < 0.0001$ ). (G) Genomic PCR showing clone genotype after hygromycin (Hygro)  
689 selection. Clone No.3 was selected for further use. (H) Live fluorescent images of SiR-  
690 DNA, RCC1-mAC, NuMA-mAID-mCh, and SiR-TUB. A spindle-pole focusing defect

691 (indicated by the arrow in panel 2) and abnormal spindle formation (panel 3) were  
692 observed in RCC1-mAC and NuMA-mAID-mCh co-depleted cells 20-24 hr after Dox  
693 and IAA treatment. Five z-section images were acquired using 1.0- $\mu\text{m}$  spacing and  
694 maximum intensity projection images are shown. (I) (C) Schematic diagram of the  
695 prometaphase degradation assay. Nocodazole was added to arrest the cells in  
696 prometaphase, and then Auxin (IAA) was added to induce RCC1 degradation during  
697 nocodazole-arrest. Nocodazole were washed out by changing medium for 15 min with  
698 peristaltic pumps, while recording the cells. See Methods for details. (J) Scatterplots of  
699 mitotic duration (from nocodazole wash-out to anaphase onset) in RCC1-positive  
700 control ( $68.7 \pm 2.1$ ,  $n=46$ ) and RCC1-depleted cells ( $61.5 \pm 1.4$ ,  $n=47$ ). Bars indicate  
701 means  $\pm$  SDs from  $>3$  independent experiments. \* indicates statistical significance  
702 according to Welch's  $t$ -test ( $p = 0.0061$ ). Scale bars = 10  $\mu\text{m}$ .

703

704 **Figure S3. Generation of cell lines for auxin-inducible degradation of endogenous**

705 **Ran-GAP1 and importin- $\beta$ .** (A) Genomic PCR showing clone genotypes after  
706 hygromycin (Hygro) selection. Clones No.6 were used. (B) Metaphase importin- $\beta$ -mAC  
707 cells showing live fluorescent images of importin- $\beta$ -mAC, and SiR-TUB. Single z-section  
708 images are shown. (C) Immunofluorescence images of fixed metaphase cells showing  
709 k-fiber localization endogenous importin- $\beta$  and mAID-tagged HURP (HURP-mACF).  
710 Maximally projected images from 3 z-sections are shown. (D) Immunoblotting for anti-  
711 importin- $\alpha$  and anti- $\alpha$ -tubulin (TUB, loading control) showing ectopic expression of the  
712 importin- $\alpha$  wild type (WT, right) and a  $\Delta\text{IBB}$  mutant (left) following Dox treatment. \*  
713 indicates endogenous importin- $\alpha$ . (E) Genomic PCR showing clone genotypes after  
714 neomycin (Neo) selection. Clone No.9 was used as a parental cell in the second  
715 selections. (F) Genomic PCR showing clone genotypes after hygromycin (Hygro)  
716 selection. Clone No.3 (NuMA-mCh) was selected. (G) Immunoblotting for anti-NuMA,  
717 anti-RanGAP1 and anti- $\alpha$ -tubulin (TUB, loading control) showing bi-allelic insertion of  
718 the indicated tags. \* and \*\* indicate RanGAP1 and SUMO-1 conjugated RanGAP1,  
719 respectively. (H) Scatterplots of the ratio of spindle length and cell diameter in control  
720 ( $0.54 \pm 0.04$ ,  $n=26$ ) and RanGAP1-depleted ( $0.52 \pm 0.07$ ,  $n=19$ ) cells. (I) Scatterplots of  
721 mitotic duration (NEBD to anaphase onset) in control ( $35.5 \pm 9.0$ ,  $n=29$ ) and RanGAP1-  
722 depleted ( $39.1 \pm 10.1$ ,  $n=23$ ) cells. Bars in (H) and (I) indicate means  $\pm$  SDs from  $>3$   
723 independent experiments. Differences were not statistically significant based on Welch's  
724  $t$ -test in H ( $p=0.2108$ ) and I ( $p=0.1851$ ). (J) Genomic PCR showing clone genotypes  
725 after neomycin (Neo) selection. Clone No.7 was used as a parental cell in the second  
726 selections. (K) Genomic PCR showing clone genotype after hygromycin (Hygro)  
727 selection. Clone No.1 was selected for further use. (L) Western blot detection using anti-  
728 NuMA, anti-importin- $\beta$  and anti- $\alpha$ -tubulin antibodies (TUB, loading control) showing bi-  
729 allelic insertion of the indicated tags. (M) Scatterplots of the ratio of spindle length and  
730 cell diameter in control ( $0.49 \pm 0.05$ ,  $n=26$ ) and importin- $\beta$ -depleted ( $0.44 \pm 0.07$ ,  $n=17$ )  
731 cells. (N) Scatterplots of mitotic duration (NEBD to anaphase onset) in control ( $41.9 \pm$   
732  $16.3$ ,  $n=27$ ) and importin- $\beta$ -depleted ( $66.7 \pm 26.7$ ,  $n=12$ ) cells. Bars in (M) and (N)  
733 indicate mean  $\pm$  SD from  $>3$  independent experiments. \* indicates statistical significance  
734 according to Welch's  $t$ -test ( $p<0.05$ ) in (M) and (N). Scale bars = 10  $\mu\text{m}$ .

735

736 **Figure S4. Generation of double knock-in cell lines that express RCC1-mAC and**  
737 **mCherry-fused TPX2, HSET, or HURP.** (A-C) Genomic PCR showing clone genotypes  
738 after hygromycin (Hygro) selections. Clones No.1 (A), No. 1 (B), and No.8 (C) were  
739 used. The mCherry cassette was inserted into only one copy of TPX2 gene loci (A).

740  
741 **Figure S5. Generation of cell lines that degrade or visualize endogenous HURP.**  
742 (A) Genomic PCR showing the clone genotype after neomycin (Neo) selection. Clone  
743 No.13 was used as a parental cell in subsequent selections. (B) Immunoblotting for anti-  
744 HURP and anti- $\alpha$ -tubulin (TUB, loading control) showing bi-allelic insertion of the  
745 indicated tags. (C-E) Genomic PCR showing clone genotypes after hygromycin (Hygro)  
746 selection. Clone No.14 (C), No. 3 (D), No. 5 (E: HURP-mCh), and No. 12 (E: importin- $\beta$ )  
747 were used, respectively. The SNAP cassette was inserted into only one copy of HURP  
748 gene loci (D).

749  
750  
751 **Figure S6. Fluorescent recovery kinetics of HURP in the presence or absence of**  
752 **importin- $\beta$ .** (A-B) Graphs showing a fitted curve or a straight line on each plot.  
753 Formulas and parameters are also indicated.

754  
755

756  
757

758 **Table S1: Cell lines used in this study.**

| No. | Name                                                  | Description                                                                                                                                           | Clo<br>ne<br>No.   | Plasmids used                                 | Par<br>ent<br>al<br>cell | Reference  |
|-----|-------------------------------------------------------|-------------------------------------------------------------------------------------------------------------------------------------------------------|--------------------|-----------------------------------------------|--------------------------|------------|
| 1   | HCT116 tet-<br>OsTIR1                                 | AAVS1::PTRE3G OsTIR1 (Puro)                                                                                                                           |                    | pAAVS1 T2 and<br>MK243<br>(Addgene#7283<br>5) |                          | [35]       |
| 2   | NuMA-mACF +<br>DHC-SNAP +<br>mCh-NuMA WT              | AAVS1::PTRE3G OsTIR1 (Puro), NuMA1::<br>NuMA-mAID-mClover-3FLAG (Neo), DHC1::<br>DHC-SNAP (BSD), Rosa26:: PTRE3G<br>mCherry-NuMA WT (Hygro)           | 7                  | hROSA26<br>CRISPR-pX330<br>and pTK503         |                          | [20]       |
| 3   | NuMA-mACF +<br>DHC-SNAP +<br>mCh-NuMA ΔNLS            | AAVS1::PTRE3G OsTIR1 (Puro), NuMA1::<br>NuMA-mAID-mClover-3FLAG (Neo), DHC1::<br>DHC-SNAP (BSD), Rosa26:: PTRE3G<br>mCherry-NuMA ΔNLS (Hygro)         | 1                  | hROSA26<br>CRISPR-pX330<br>and pTK699         | 2                        | This study |
| 4   | NuMA-mACF +<br>DHC-SNAP +<br>mCh-NuMAΔex24            | AAVS1::PTRE3G OsTIR1 (Puro), NuMA1::<br>NuMA-mAID-mClover-3FLAG (Neo), DHC1::<br>DHC-SNAP (BSD), Rosa26:: PTRE3G<br>mCherry-NuMA Δex24 (Hygro)        | 1                  | hROSA26<br>CRISPR-pX330<br>and pTK700         | 2                        | This study |
| 5   | NuMA-mACF +<br>DHC-SNAP +<br>mCh-NuMA<br>Δ(NLS+MTBD2) | AAVS1::PTRE3G OsTIR1 (Puro), NuMA1::<br>NuMA-mAID-mClover-3FLAG (Neo), DHC1::<br>DHC-SNAP (BSD), Rosa26:: PTRE3G<br>mCherry-NuMA Δ(NLS+MTBD2) (Hygro) | 1                  | hROSA26<br>CRISPR-pX330<br>and pTK509         | 2                        | This study |
| 6   | NuMA-mACF +<br>DHC-SNAP +<br>mCh-NuMA ΔC-<br>ter      | AAVS1::PTRE3G OsTIR1 (Puro), NuMA1::<br>NuMA-mAID-mClover-3FLAG (Neo), DHC1::<br>DHC-SNAP (BSD), Rosa26:: PTRE3G<br>mCherry-NuMA ΔC-ter (Hygro)       | 3                  | hROSA26<br>CRISPR-pX330<br>and pTK510         | 2                        | This study |
| 7   | Flip-In T-REx 293                                     | Invitrogen                                                                                                                                            |                    |                                               |                          | [57]       |
| 8   | Flip-In T-REx 293<br>importin-α-WT<br>mCherry         | Flip-In:: importin-α-WT mCherry (hygro)                                                                                                               | Poly<br>clon<br>al | pOG44 and<br>pTK960                           | 7                        | This study |
| 9   | Flip-In T-REx 293<br>importin-α-ΔIBB<br>mCherry       | Flip-In:: importin-α-ΔIBB mCherry (hygro)                                                                                                             | Poly<br>clon<br>al | pOG44 and<br>pTK961                           | 7                        | This study |
| 10  | RCC1-mAC                                              | AAVS1::PTRE3G OsTIR1 (Puro), RCC1::<br>RCC1-mAID-mClover (Neo)                                                                                        | 1                  | pTK361+<br>pHH45                              | 1                        | This study |
| 11  | RCC1-mAC +<br>NuMA-mCh                                | AAVS1::PTRE3G OsTIR1 (Puro), RCC1::<br>RCC1-mAID-mClover (Neo), NuMA1::<br>NuMA-mCh (Hygro)                                                           | 1                  | pTK372+<br>pTK435                             | 10                       | This study |
| 12  | RanGAP1-mAC                                           | AAVS1::PTRE3G OsTIR1 (Puro),<br>RanGAP1:: RanGAP1-mAID-mClover (Neo)                                                                                  | 9                  | pHH49 +<br>pHH51                              | 1                        | This study |
| 13  | RanGAP1-mAC +<br>NuMA-mCh                             | AAVS1::PTRE3G OsTIR1 (Puro),<br>RanGAP1:: RanGAP1-mAID-mClover (Neo),<br>NuMA1:: NuMA-mCh (Hygro)                                                     | 5                  | pTK372+<br>pTK435                             | 12                       | This study |
| 14  | importin-β-mAC                                        | AAVS1::PTRE3G OsTIR1 (Puro), importin-<br>β:: importin-β-mAID-mClover (Neo)                                                                           | 7                  | pHH50 +<br>pHH57                              | 1                        | This study |
| 15  | importin-β-mAC +<br>NuMA-mCh                          | AAVS1::PTRE3G OsTIR1 (Puro), importin-<br>β:: importin-β-mAID-mClover (Neo),<br>NuMA1:: NuMA-mCh (Hygro)                                              | 1                  | pTK372+<br>pTK435                             | 14                       | This study |
| 16  | RCC1-mAC +<br>importin-β-mCh                          | AAVS1::PTRE3G OsTIR1 (Puro), RCC1::<br>RCC1-mAID-mClover (Neo), NuMA1::<br>NuMA-mCh (Hygro)                                                           | 6                  | pHH50 +<br>pTK481                             | 10                       | This study |



|    |                                      |                                                                                                                        |    |                |    |            |
|----|--------------------------------------|------------------------------------------------------------------------------------------------------------------------|----|----------------|----|------------|
| 17 | RCC1-mAC + HURP-mCh                  | AAVS1::PTRE3G OsTIR1 (Puro), RCC1::RCC1-mAID-mClover (Neo), HURP:: HURP-mCh (Hygro)                                    | 8  | pTK532+ pTK541 | 10 | This study |
| 18 | RCC1-mAC + TPX2-mCh                  | AAVS1::PTRE3G OsTIR1 (Puro), RCC1::RCC1-mAID-mClover (Neo), TPX2:: TPX2-mCh (Hygro)                                    | 1  | pTK527+ pTK502 | 10 | This study |
| 19 | RCC1-mAC + mCh-HSET                  | AAVS1::PTRE3G OsTIR1 (Puro), RCC1::RCC1-mAID-mClover (Neo), HSET:: mCh-HSET (Hygro)                                    | 1  | pTK523+ pTK531 | 10 | This study |
| 20 | RanGAP1-mAC + HURP-mCh               | AAVS1::PTRE3G OsTIR1 (Puro), RanGAP1:: RanGAP1-mAID-mClover (Neo), HURP:: HURP-mCh (Hygro)                             | 5  | pTK532+ pTK541 | 12 | This study |
| 21 | RanGAP1-mAC + importin- $\beta$ -mCh | AAVS1::PTRE3G OsTIR1 (Puro), RanGAP1:: RanGAP1-mAID-mClover (Neo), importin- $\beta$ :: importin- $\beta$ -mCh (Hygro) | 12 | pHH50 + pTK481 | 12 | This study |
| 22 | importin- $\beta$ -mAC + HURP-SNAP   | AAVS1::PTRE3G OsTIR1 (Puro), importin- $\beta$ :: importin- $\beta$ -mAID-mClover (Neo), HURP:: HURP-SNAP (Hygro)      | 3  | pTK532+ pTK589 | 14 | This study |
| 23 | HURP-mACF                            | AAVS1::PTRE3G OsTIR1 (Puro), HURP:: HURP-mAID-mClover-3FLAG (Neo)                                                      | 13 | pTK532+ pTK596 | 1  | This study |
| 24 | HURP-mACF + importin- $\beta$ -mCh   | AAVS1::PTRE3G OsTIR1 (Puro), HURP:: HURP-mAID-mClover-3FLAG (Neo), importin- $\beta$ :: importin- $\beta$ -mCh (Hygro) | 14 | pHH50 + pTK481 | 23 | This study |

759

760

761 **Table S2: sgRNA sequences for CRISPR/Cas9-mediated genome editing**

| Gene locus                     | sgRNA (5'-3')         | PAM | Plasmid Name |
|--------------------------------|-----------------------|-----|--------------|
| NuMA1 (C-terminus)             | gtggggccactcactgtgtac | tgg | pTK372 [20]  |
| RCC1 (C-terminus)              | gactgtatgtgtggccccgc  | tgg | pTK361       |
| RanGAP1 (C-terminus)           | tctgctgcagacgctgtaca  | agg | pHH49        |
| importin- $\beta$ (C-terminus) | agttcgagccgccgcccga   | agg | pHH50        |
| HURP                           | caaaattctcctggtgtag   | agg | pTK532       |
| TPX2                           | tgccgataccgccggcaat   | ggg | pTK527       |
| HSET                           | tgcatccccggcgctgt     | ggg | pTK523       |

762

763 **Table S3: PCR primers used to confirm gene editing**

| Gene              | Primer sequence          | Primer name | Figures                   |
|-------------------|--------------------------|-------------|---------------------------|
| RCC1              | gaatgccattccaggcag       | oHH88       | Figure S2A                |
| RCC1              | ttctgcacgttctctgg        | oHH89       | Figure S2A                |
| NUMA1             | gagcctcaaagaaggccc       | oTK542      | Figure S2B, S2G, S3F, S3K |
| NUMA1             | agcaggaaccagggcctac      | oTK566      | Figure S2B, S2G, S3F, S3K |
| RanGAP1           | gctgccgcaggaccagggtgtg   | oHH93       | Figure S3E                |
| RanGAP1           | attccctggcctatgtctgtggaa | oHH94       | Figure S3E                |
| HURP              | ctcttgatggatacttactg     | oTK749      | Figure S4C, S5A, S5D, S5E |
| HURP              | cccttgagaaagagtatatcta   | oTK750      | Figure S4C, S5A, S5D, S5E |
| importin- $\beta$ | ggagtaaggagtttgagagtatcg | oHH97       | Figure S3A, S3J, S5C, S5E |
| importin- $\beta$ | aaatcttcttagagctaggcaacg | oHH98       | Figure S3A, S3J, S5C, S5E |
| TPX2              | tctgacatcccctcactg       | oTK660      | Figure S4A                |
| TPX2              | ggagtctaactcgagacattc    | oTK661      | Figure S4A                |
| HSET              | ggccctcggctgtggc         | oTK766      | Figure S4B                |
| HSET              | ctccccgggtgctctaag       | oTK767      | Figure S4B                |
| Rosa 26           | ggtagggaggcgtgttc        | oTK846      | Figure S1B                |
| mCherry-NuMA      | ctgtggggtctgcaggat       | oTK445      | Figure S1B                |

764

765



## 766 References

767

- 768 1. Reber, S., and Hyman, A.A. (2015). Emergent Properties of the Metaphase Spindle. *Cold Spring Harb*  
769 *Perspect Biol* 7, a015784.
- 770 2. Heald, R., and Khodjakov, A. (2015). Thirty years of search and capture: The complex simplicity of mitotic  
771 spindle assembly. *J Cell Biol* 211, 1103-1111.
- 772 3. Kalab, P., and Heald, R. (2008). The RanGTP gradient - a GPS for the mitotic spindle. *J Cell Sci* 121,  
773 1577-1586.
- 774 4. Forbes, D.J., Travesa, A., Nord, M.S., and Bernis, C. (2015). Reprint of "Nuclear transport factors: global  
775 regulation of mitosis". *Curr Opin Cell Biol* 34, 122-134.
- 776 5. Bischoff, F.R., and Ponstingl, H. (1991). Catalysis of guanine nucleotide exchange on Ran by the mitotic  
777 regulator RCC1. *Nature* 354, 80-82.
- 778 6. Bischoff, F.R., Klebe, C., Kretschmer, J., Wittinghofer, A., and Ponstingl, H. (1994). RanGAP1 induces  
779 GTPase activity of nuclear Ras-related Ran. *Proc Natl Acad Sci U S A* 91, 2587-2591.
- 780 7. Kalab, P., Weis, K., and Heald, R. (2002). Visualization of a Ran-GTP gradient in interphase and mitotic  
781 *Xenopus* egg extracts. *Science* 295, 2452-2456.
- 782 8. Kalab, P., Pralle, A., Isacoff, E.Y., Heald, R., and Weis, K. (2006). Analysis of a RanGTP-regulated  
783 gradient in mitotic somatic cells. *Nature* 440, 697-701.
- 784 9. Dumont, J., Petri, S., Pellegrin, F., Terret, M.E., Bohnsack, M.T., Rassinier, P., Georget, V., Kalab, P.,  
785 Gruss, O.J., and Verlhac, M.H. (2007). A centriole- and RanGTP-independent spindle assembly pathway in  
786 meiosis I of vertebrate oocytes. *J Cell Biol* 176, 295-305.
- 787 10. Moutinho-Pereira, S., Stuurman, N., Afonso, O., Hornsveld, M., Aguiar, P., Goshima, G., Vale, R.D., and  
788 Maiato, H. (2013). Genes involved in centrosome-independent mitotic spindle assembly in *Drosophila* S2  
789 cells. *Proc Natl Acad Sci U S A* 110, 19808-19813.
- 790 11. Hasegawa, K., Ryu, S.J., and Kalab, P. (2013). Chromosomal gain promotes formation of a steep RanGTP  
791 gradient that drives mitosis in aneuploid cells. *J Cell Biol* 200, 151-161.
- 792 12. Holubcova, Z., Blayney, M., Elder, K., and Schuh, M. (2015). Human oocytes. Error-prone chromosome-  
793 mediated spindle assembly favors chromosome segregation defects in human oocytes. *Science* 348, 1143-  
794 1147.
- 795 13. Drutovic, D., Duan, X., Li, R., Kalab, P., and Solc, P. (2020). RanGTP and importin beta regulate meiosis I  
796 spindle assembly and function in mouse oocytes. *EMBO J* 39, e101689.
- 797 14. Furuta, M., Hori, T., and Fukagawa, T. (2016). Chromatin binding of RCC1 during mitosis is important for  
798 its nuclear localization in interphase. *Mol Biol Cell* 27, 371-381.
- 799 15. Nachury, M.V., Maresca, T.J., Salmon, W.C., Waterman-Storer, C.M., Heald, R., and Weis, K. (2001).  
800 Importin beta is a mitotic target of the small GTPase Ran in spindle assembly. *Cell* 104, 95-106.
- 801 16. Wiese, C., Wilde, A., Moore, M.S., Adam, S.A., Merdes, A., and Zheng, Y. (2001). Role of importin-beta  
802 in coupling Ran to downstream targets in microtubule assembly. *Science* 291, 653-656.
- 803 17. Gruss, O.J., Carazo-Salas, R.E., Schatz, C.A., Guarguaglini, G., Kast, J., Wilm, M., Le Bot, N., Vernos, I.,  
804 Karsenti, E., and Mattaj, I.W. (2001). Ran induces spindle assembly by reversing the inhibitory effect of  
805 importin alpha on TPX2 activity. *Cell* 104, 83-93.
- 806 18. Stewart, M. (2007). Molecular mechanism of the nuclear protein import cycle. *Nat Rev Mol Cell Biol* 8,  
807 195-208.
- 808 19. Hueschen, C.L., Kenny, S.J., Xu, K., and Dumont, S. (2017). NuMA recruits dynein activity to microtubule  
809 minus-ends at mitosis. *Elife* 6.
- 810 20. Okumura, M., Natsume, T., Kanemaki, M.T., and Kiyomitsu, T. (2018). Dynein-Dynactin-NuMA clusters  
811 generate cortical spindle-pulling forces as a multi-arm ensemble. *Elife* 7.
- 812 21. Gaglio, T., Saredi, A., and Compton, D.A. (1995). NuMA is required for the organization of microtubules  
813 into aster-like mitotic arrays. *J Cell Biol* 131, 693-708.
- 814 22. Silk, A.D., Holland, A.J., and Cleveland, D.W. (2009). Requirements for NuMA in maintenance and  
815 establishment of mammalian spindle poles. *J Cell Biol* 184, 677-690.
- 816 23. Wittmann, T., Wilm, M., Karsenti, E., and Vernos, I. (2000). TPX2, A novel *xenopus* MAP involved in  
817 spindle pole organization. *J Cell Biol* 149, 1405-1418.
- 818 24. Garrett, S., Auer, K., Compton, D.A., and Kapoor, T.M. (2002). hTPX2 is required for normal spindle  
819 morphology and centrosome integrity during vertebrate cell division. *Curr Biol* 12, 2055-2059.

- 820 25. Petry, S., Groen, A.C., Ishihara, K., Mitchison, T.J., and Vale, R.D. (2013). Branching microtubule  
821 nucleation in *Xenopus* egg extracts mediated by augmin and TPX2. *Cell* *152*, 768-777.
- 822 26. Roostalu, J., Cade, N.I., and Surrey, T. (2015). Complementary activities of TPX2 and chTOG constitute  
823 an efficient importin-regulated microtubule nucleation module. *Nat Cell Biol* *17*, 1422-1434.
- 824 27. King, M.R., and Petry, S. (2020). Phase separation of TPX2 enhances and spatially coordinates microtubule  
825 nucleation. *Nat Commun* *11*, 270.
- 826 28. Ems-McClung, S.C., Zheng, Y., and Walczak, C.E. (2004). Importin alpha/beta and Ran-GTP regulate  
827 XCTK2 microtubule binding through a bipartite nuclear localization signal. *Mol Biol Cell* *15*, 46-57.
- 828 29. Ems-McClung, S.C., Emch, M., Zhang, S., Mahnoor, S., Weaver, L.N., and Walczak, C.E. (2020).  
829 RanGTP induces an effector gradient of XCTK2 and importin alpha/beta for spindle microtubule cross-  
830 linking. *J Cell Biol* *219*.
- 831 30. Cai, S., Weaver, L.N., Ems-McClung, S.C., and Walczak, C.E. (2009). Kinesin-14 family proteins  
832 HSET/XCTK2 control spindle length by cross-linking and sliding microtubules. *Mol Biol Cell* *20*, 1348-  
833 1359.
- 834 31. Sillje, H.H., Nagel, S., Korner, R., and Nigg, E.A. (2006). HURP is a Ran-importin beta-regulated protein  
835 that stabilizes kinetochore microtubules in the vicinity of chromosomes. *Curr Biol* *16*, 731-742.
- 836 32. Chang, C.C., Huang, T.L., Shimamoto, Y., Tsai, S.Y., and Hsia, K.C. (2017). Regulation of mitotic spindle  
837 assembly factor NuMA by Importin-beta. *J Cell Biol* *216*, 3453-3462.
- 838 33. Giesecke, A., and Stewart, M. (2010). Novel binding of the mitotic regulator TPX2 (target protein for  
839 *Xenopus* kinesin-like protein 2) to importin-alpha. *J Biol Chem* *285*, 17628-17635.
- 840 34. Kiyomitsu, T. (2019). The cortical force-generating machinery: how cortical spindle-pulling forces are  
841 generated. *Curr Opin Cell Biol* *60*, 1-8.
- 842 35. Natsume, T., Kiyomitsu, T., Saga, Y., and Kanemaki, M.T. (2016). Rapid Protein Depletion in Human  
843 Cells by Auxin-Inducible Degron Tagging with Short Homology Donors. *Cell Rep* *15*, 210-218.
- 844 36. Seldin, L., Muroyama, A., and Lechler, T. (2016). NuMA-microtubule interactions are critical for spindle  
845 orientation and the morphogenesis of diverse epidermal structures. *Elife* *5*.
- 846 37. Gallini, S., Carminati, M., De Mattia, F., Pirovano, L., Martini, E., Oldani, A., Asteriti, I.A., Guarguaglini,  
847 G., and Mapelli, M. (2016). NuMA Phosphorylation by Aurora-A Orchestrates Spindle Orientation. *Curr*  
848 *Biol* *26*, 458-469.
- 849 38. Siller, K.H., Cabernard, C., and Doe, C.Q. (2006). The NuMA-related Mud protein binds Pins and  
850 regulates spindle orientation in *Drosophila* neuroblasts. *Nat Cell Biol* *8*, 594-600.
- 851 39. Du, Q., Stukenberg, P.T., and Macara, I.G. (2001). A mammalian Partner of inscuteable binds NuMA and  
852 regulates mitotic spindle organization. *Nat Cell Biol* *3*, 1069-1075.
- 853 40. Tang, T.K., Tang, C.J., Chao, Y.J., and Wu, C.W. (1994). Nuclear mitotic apparatus protein (NuMA):  
854 spindle association, nuclear targeting and differential subcellular localization of various NuMA isoforms. *J*  
855 *Cell Sci* *107 (Pt 6)*, 1389-1402.
- 856 41. Kohler, M., Speck, C., Christiansen, M., Bischoff, F.R., Prehn, S., Haller, H., Gorlich, D., and Hartmann,  
857 E. (1999). Evidence for distinct substrate specificities of importin alpha family members in nuclear protein  
858 import. *Mol Cell Biol* *19*, 7782-7791.
- 859 42. Ciciarello, M., Mangiacasale, R., Thibier, C., Guarguaglini, G., Marchetti, E., Di Fiore, B., and Lavia, P.  
860 (2004). Importin beta is transported to spindle poles during mitosis and regulates Ran-dependent spindle  
861 assembly factors in mammalian cells. *J Cell Sci* *117*, 6511-6522.
- 862 43. Song, L., Craney, A., and Rape, M. (2014). Microtubule-dependent regulation of mitotic protein  
863 degradation. *Mol Cell* *53*, 179-192.
- 864 44. Sackton, K.L., Dimova, N., Zeng, X., Tian, W., Zhang, M., Sackton, T.B., Meaders, J., Pfaff, K.L.,  
865 Sigoillot, F., Yu, H., et al. (2014). Synergistic blockade of mitotic exit by two chemical inhibitors of the  
866 APC/C. *Nature* *514*, 646-649.
- 867 45. Wei, J.H., Zhang, Z.C., Wynn, R.M., and Seemann, J. (2015). GM130 Regulates Golgi-Derived Spindle  
868 Assembly by Activating TPX2 and Capturing Microtubules. *Cell* *162*, 287-299.
- 869 46. Brownlee, C., and Heald, R. (2019). Importin alpha Partitioning to the Plasma Membrane Regulates  
870 Intracellular Scaling. *Cell* *176*, 805-815 e808.
- 871 47. Chinen, T., Yamamoto, S., Takeda, Y., Watanabe, K., Kuroki, K., Hashimoto, K., Takao, D., and  
872 Kitagawa, D. (2020). NuMA assemblies organize microtubule asters to establish spindle bipolarity in  
873 acentrosomal human cells. *EMBO J* *39*, e102378.

- 874 48. Lorson, M.A., Horvitz, H.R., and van den Heuvel, S. (2000). LIN-5 is a novel component of the spindle  
875 apparatus required for chromosome segregation and cleavage plane specification in *Caenorhabditis elegans*.  
876 *J Cell Biol* *148*, 73-86.
- 877 49. Greenberg, S.R., Tan, W., and Lee, W.L. (2018). Num1 versus NuMA: insights from two functionally  
878 homologous proteins. *Biophys Rev* *10*, 1631-1636.
- 879 50. Weaver, L.N., Ems-McClung, S.C., Chen, S.H., Yang, G., Shaw, S.L., and Walczak, C.E. (2015). The Ran-  
880 GTP gradient spatially regulates XCTK2 in the spindle. *Curr Biol* *25*, 1509-1514.
- 881 51. Sikirzhyski, V., Renda, F., Tikhonenko, I., Magidson, V., McEwen, B.F., and Khodjakov, A. (2018).  
882 Microtubules assemble near most kinetochores during early prometaphase in human cells. *J Cell Biol* *217*,  
883 2647-2659.
- 884 52. Booth, D.G., Hood, F.E., Prior, I.A., and Royle, S.J. (2011). A TACC3/ch-TOG/clathrin complex stabilises  
885 kinetochore fibres by inter-microtubule bridging. *EMBO J* *30*, 906-919.
- 886 53. Nishimoto, T., Eilen, E., and Basilico, C. (1978). Premature of chromosome condensation in a ts DNA-  
887 mutant of BHK cells. *Cell* *15*, 475-483.
- 888 54. Kiyomitsu, T., and Cheeseman, I.M. (2012). Chromosome- and spindle-pole-derived signals generate an  
889 intrinsic code for spindle position and orientation. *Nat Cell Biol* *14*, 311-317.
- 890 55. Soderholm, J.F., Bird, S.L., Kalab, P., Sampathkumar, Y., Hasegawa, K., Uehara-Bingen, M., Weis, K.,  
891 and Heald, R. (2011). Importazole, a small molecule inhibitor of the transport receptor importin-beta. *ACS*  
892 *Chem Biol* *6*, 700-708.
- 893 56. Kiyomitsu, T., and Cheeseman, I.M. (2013). Cortical dynein and asymmetric membrane elongation  
894 coordinately position the spindle in anaphase. *Cell* *154*, 391-402.
- 895 57. Kiyomitsu, T., Murakami, H., and Yanagida, M. (2011). Protein interaction domain mapping of human  
896 kinetochore protein Blinkin reveals a consensus motif for binding of spindle assembly checkpoint proteins  
897 Bub1 and BubR1. *Mol Cell Biol* *31*, 998-1011.
- 898 58. Goshima, G., Nedelec, F., and Vale, R.D. (2005). Mechanisms for focusing mitotic spindle poles by minus  
899 end-directed motor proteins. *J Cell Biol* *171*, 229-240.
- 900

# Figure 1

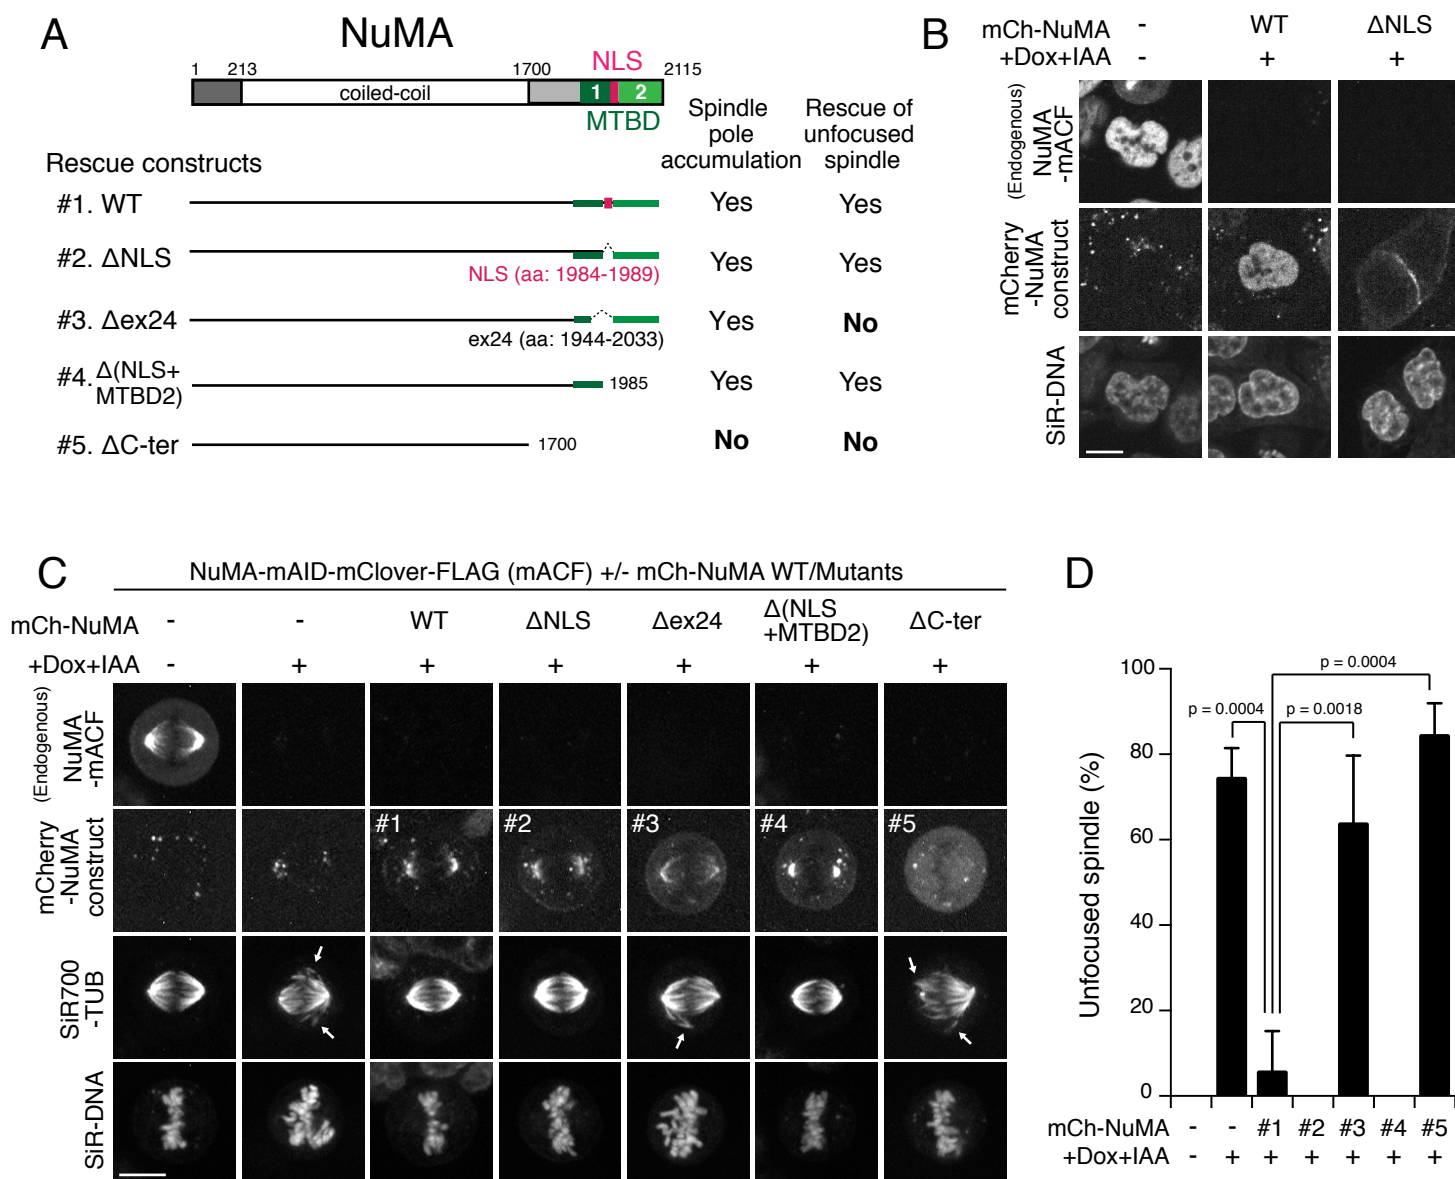

Figure 1. NuMA acts in spindle pole focusing using its conserved microtubule-binding domain in human cells.



## Figure 2

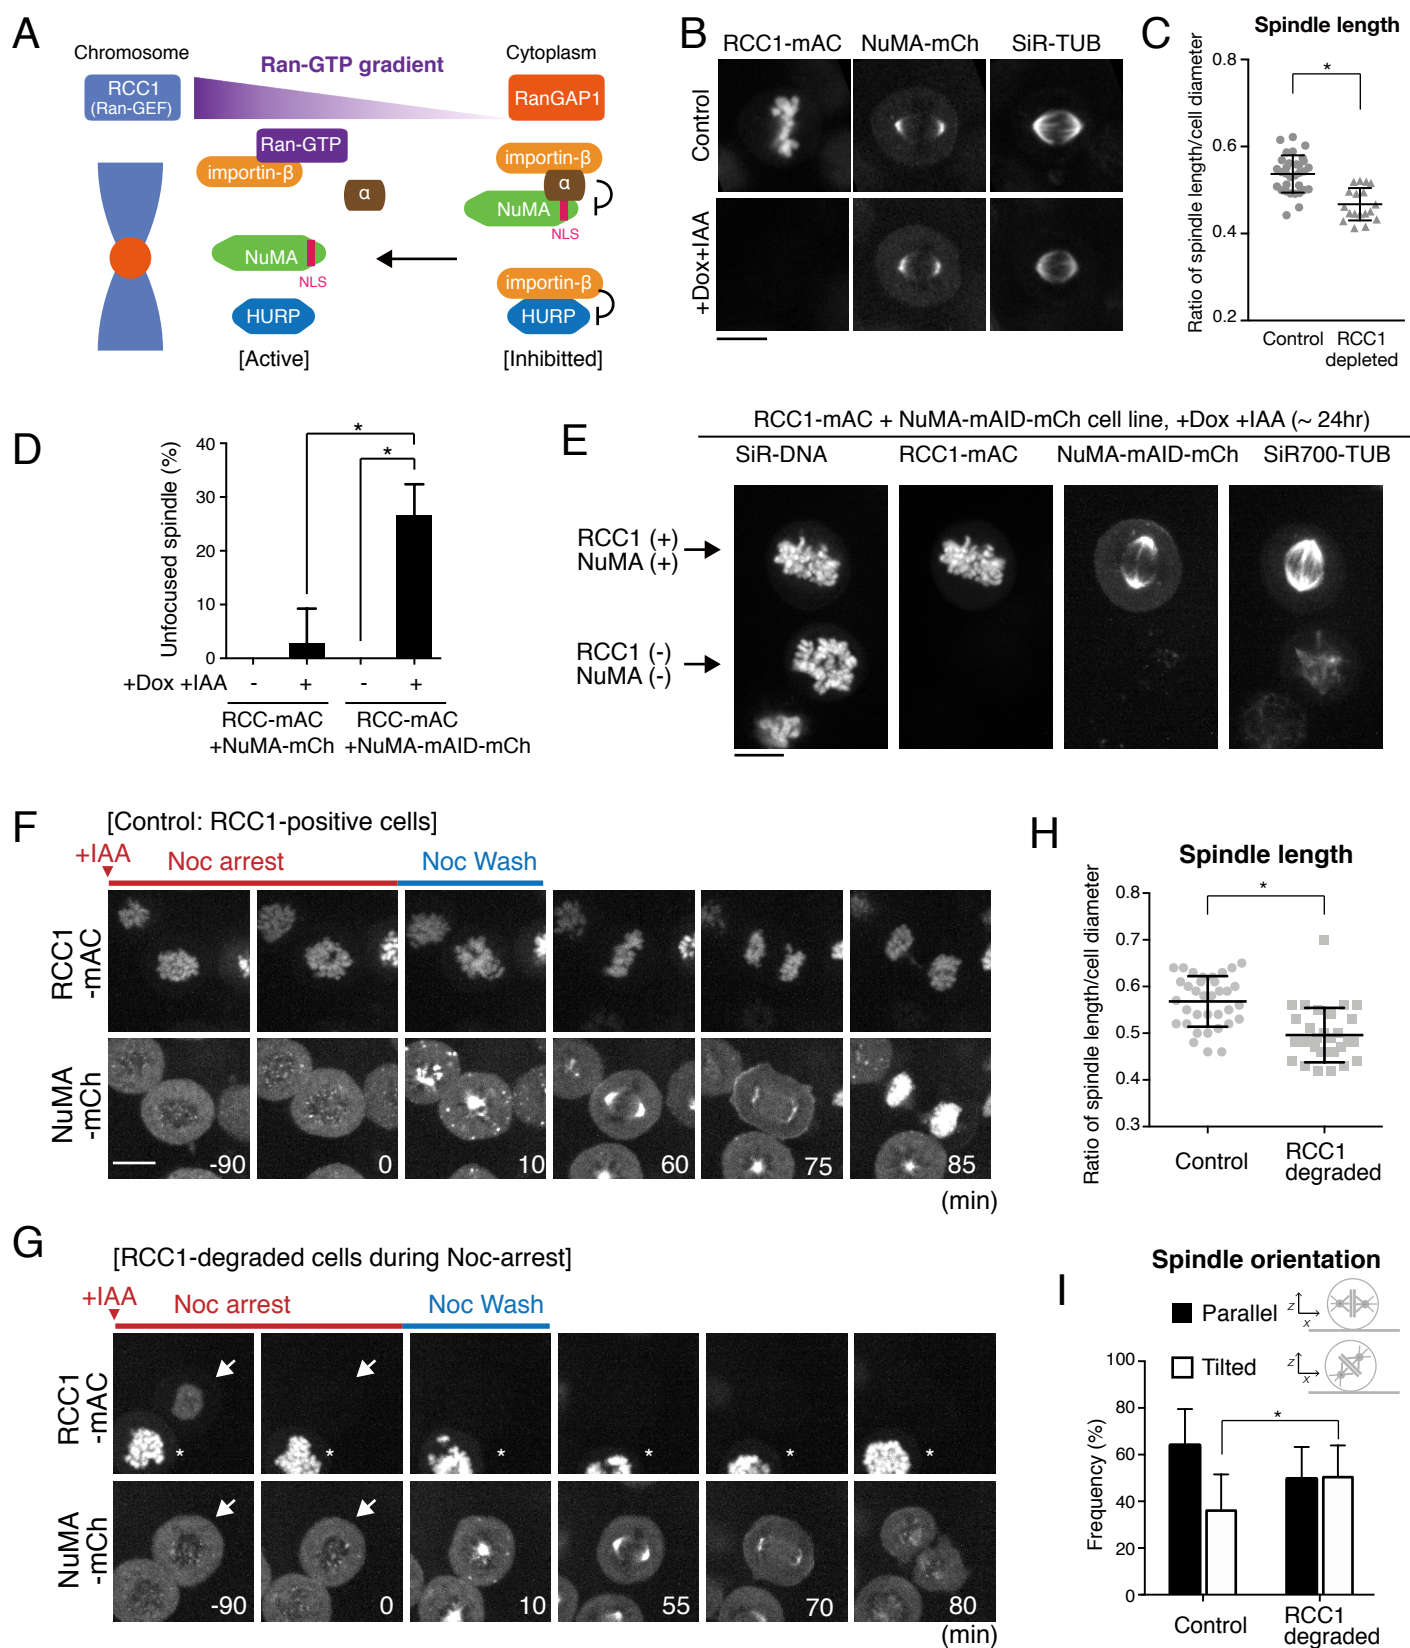

Figure 2. NuMA functions in spindle pole focusing independently of RCC1.

## Figure 3

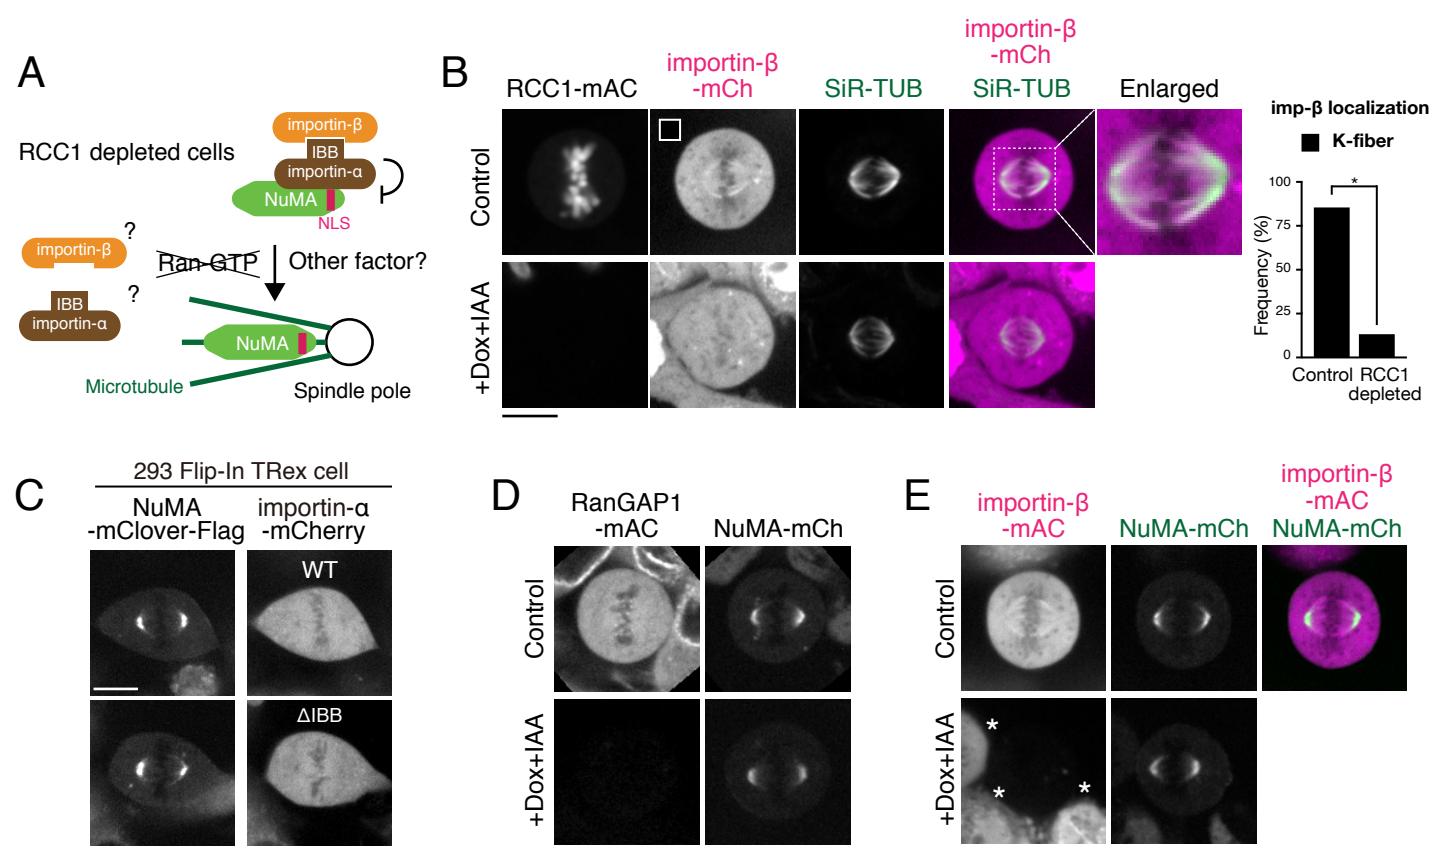

Figure 3. NuMA is liberated from importins at spindle poles independently of Ran-GTP.

## Figure 4

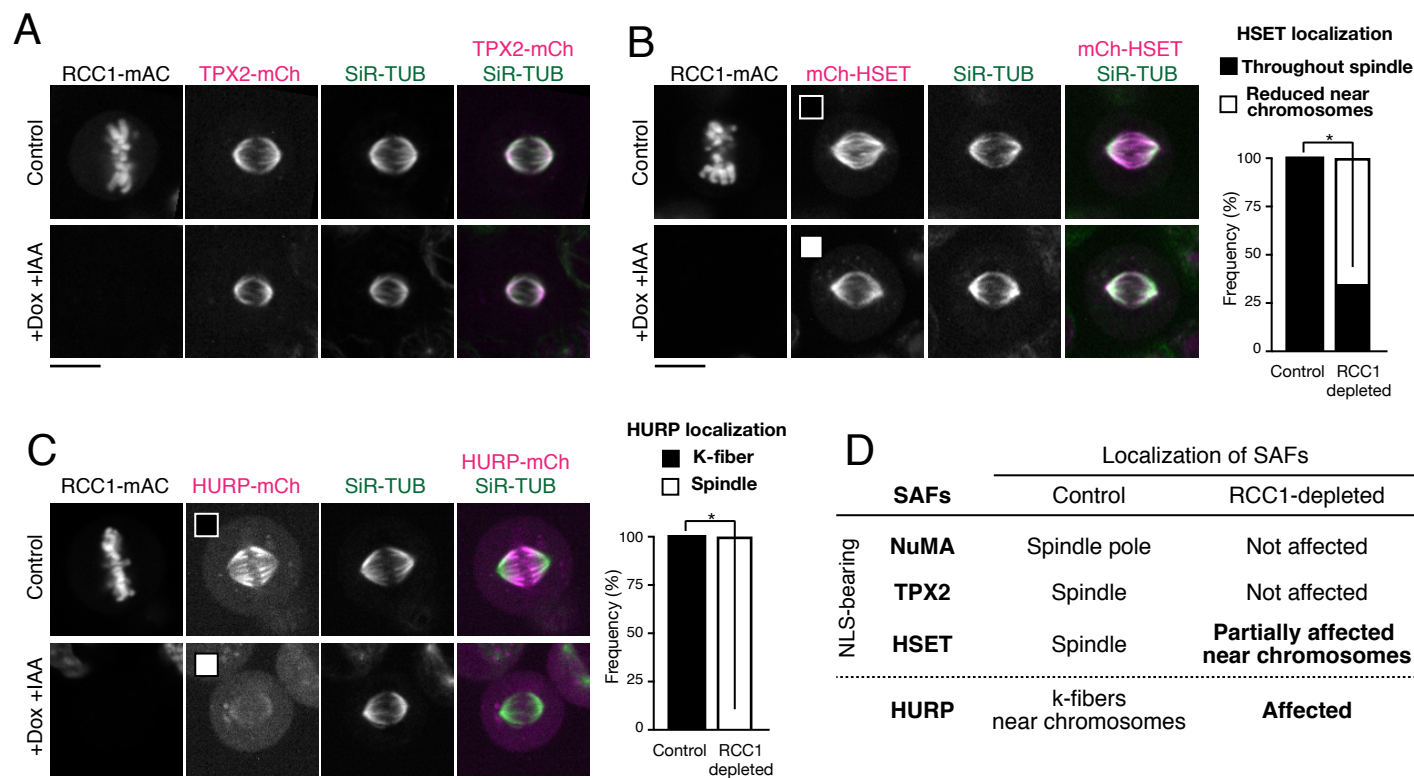

Figure 4. RCC1 regulates chromosome-proximal localization of HURP and HSET.

## Figure 5

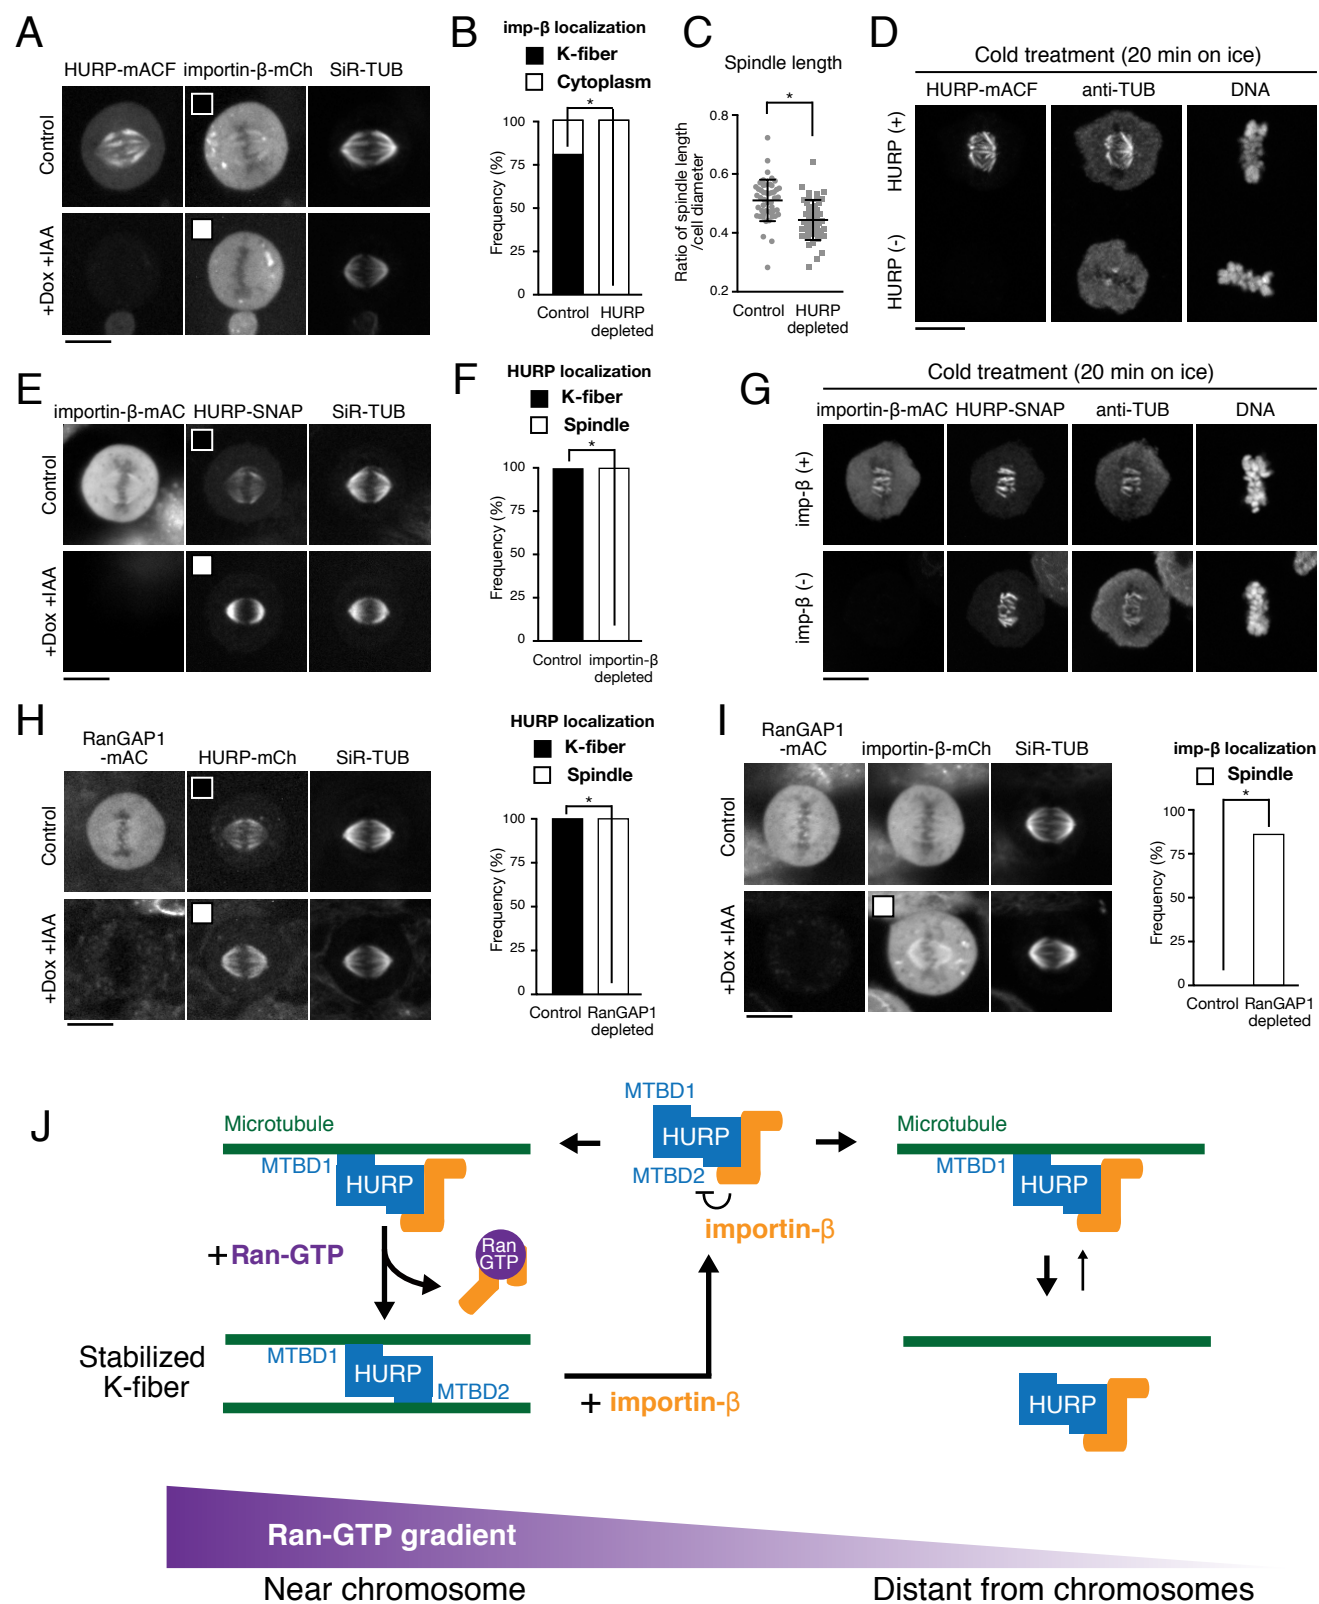

Figure 5. HURP, but not importin- $\beta$ , is required to stabilize k-fibers.



## Figure 6

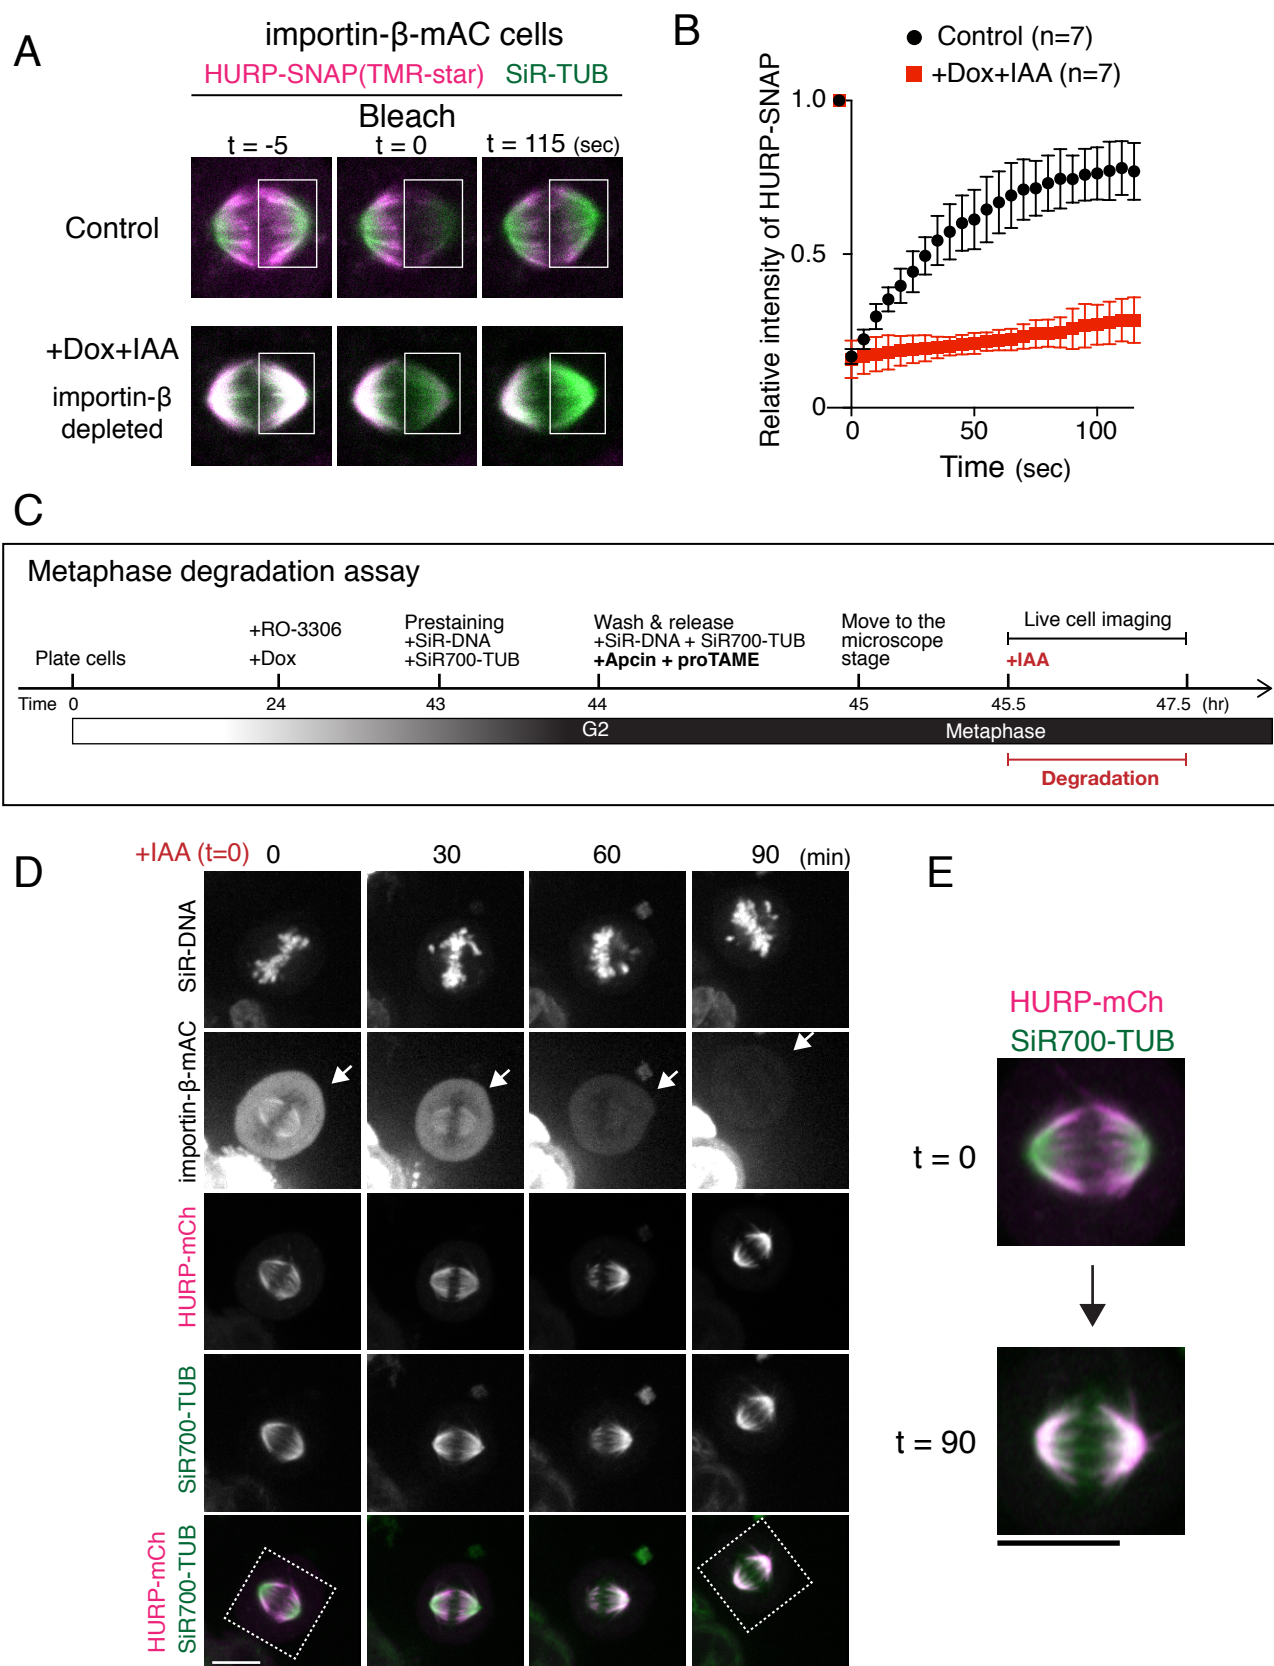

Figure 6. HURP dynamically accumulates on metaphase k-fibers in an importin- $\beta$  dependent manner.

# Figure 7

bioRxiv preprint doi: <https://doi.org/10.1101/473538>; this version posted April 23, 2020. The copyright holder for this preprint (which was not certified by peer review) is the author/funder. All rights reserved. No reuse allowed without permission.

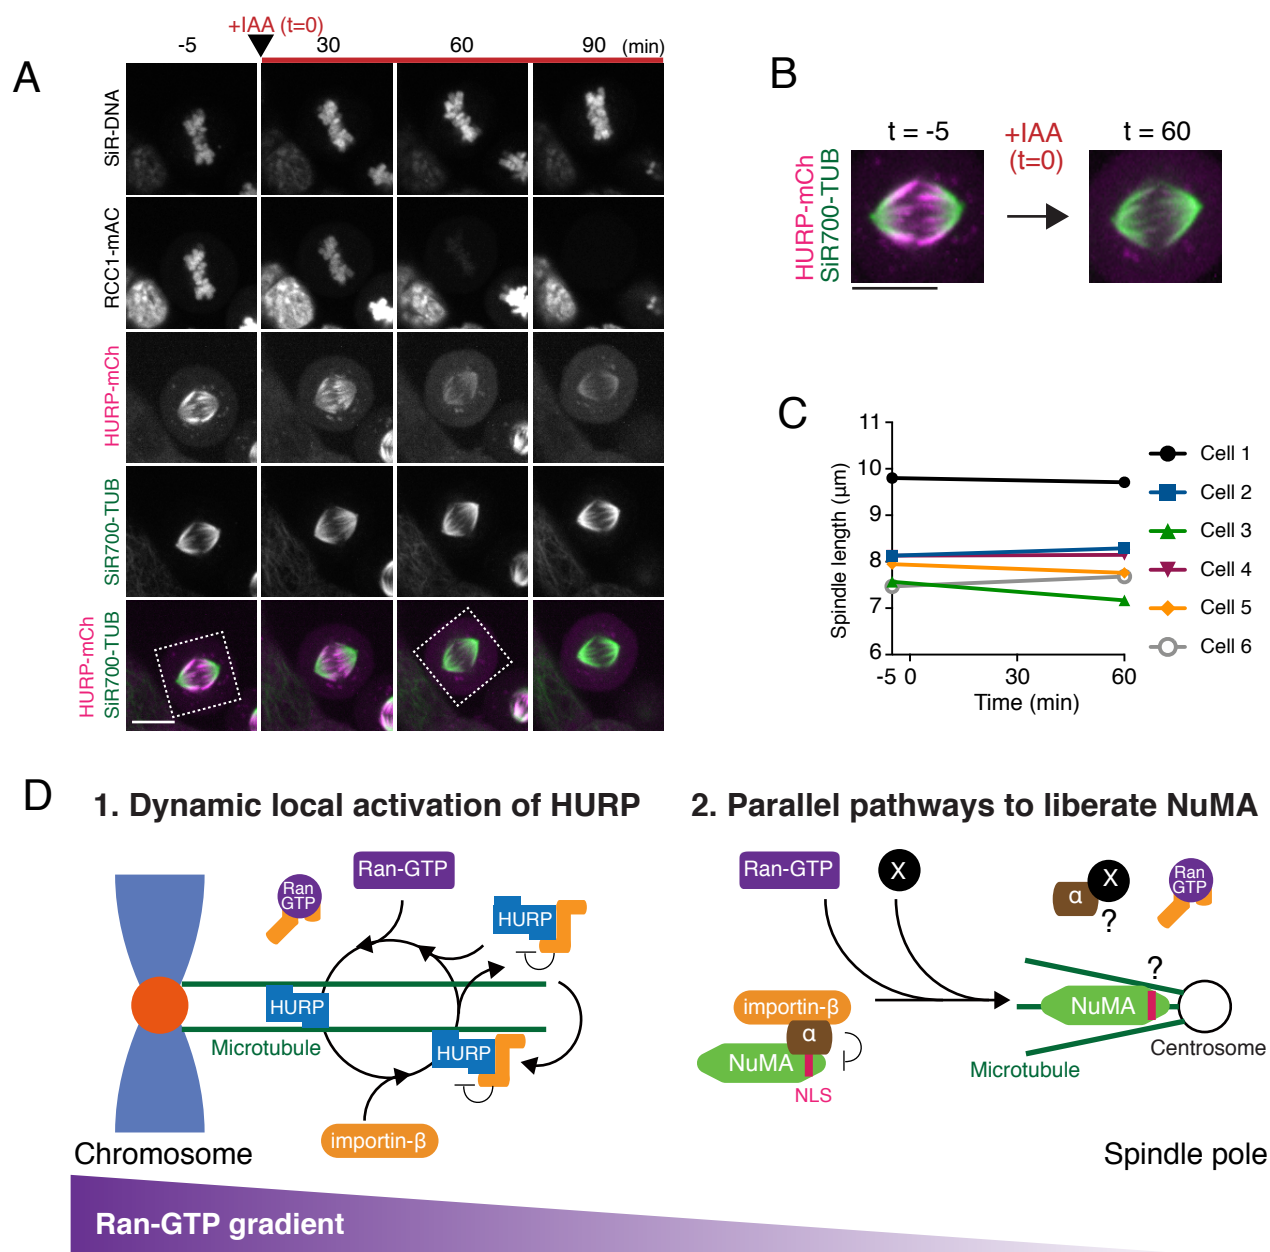

Figure 7. Models of local activation mechanisms for HURP and NuMA in mitosis.

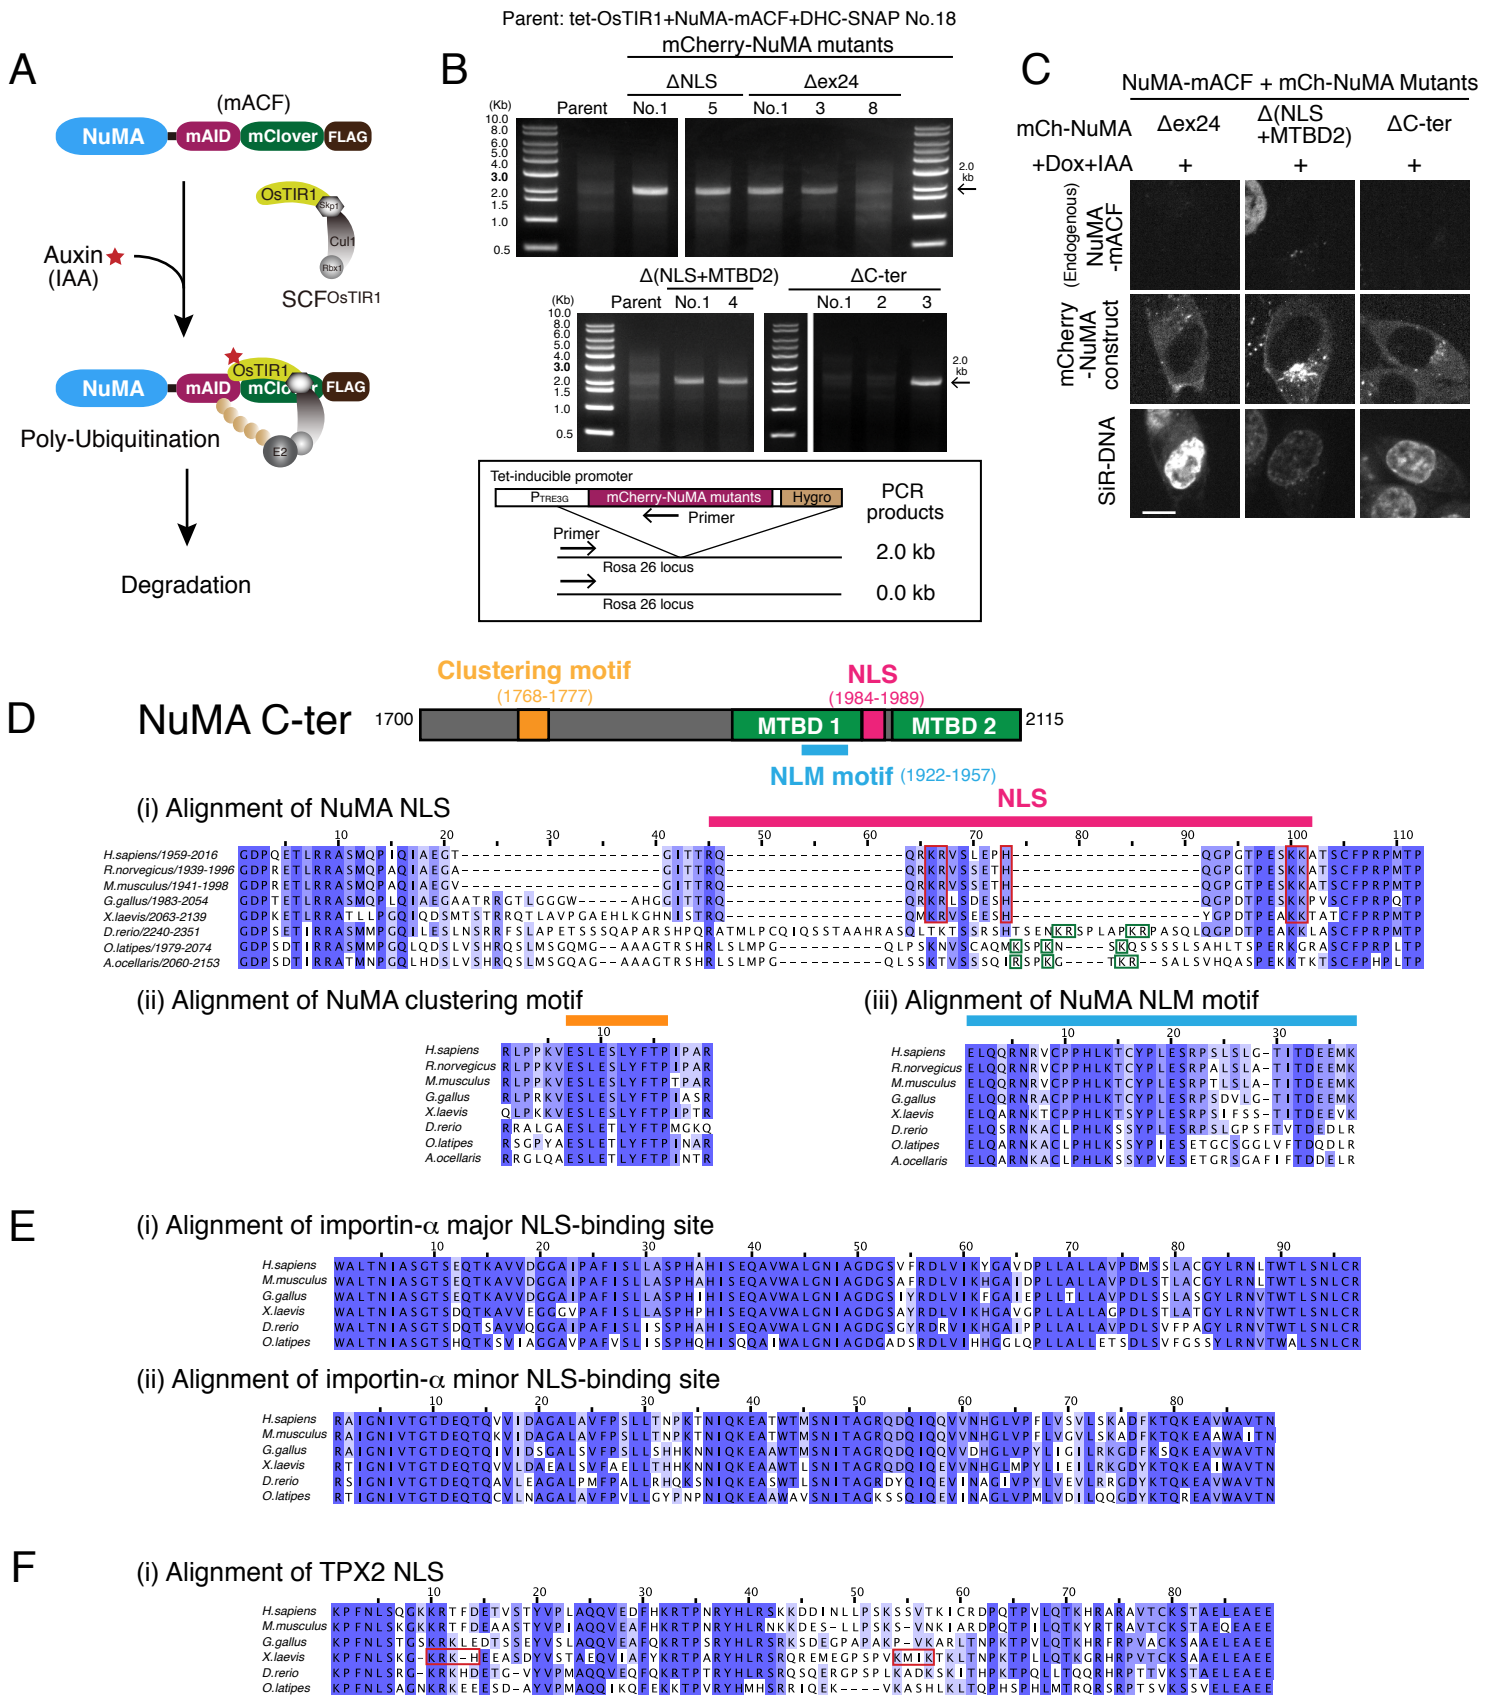

Figure S1. Generation of cell lines that conditionally degrade endogenous NuMA and express NuMA mutants.

## Supplemental Figure S2

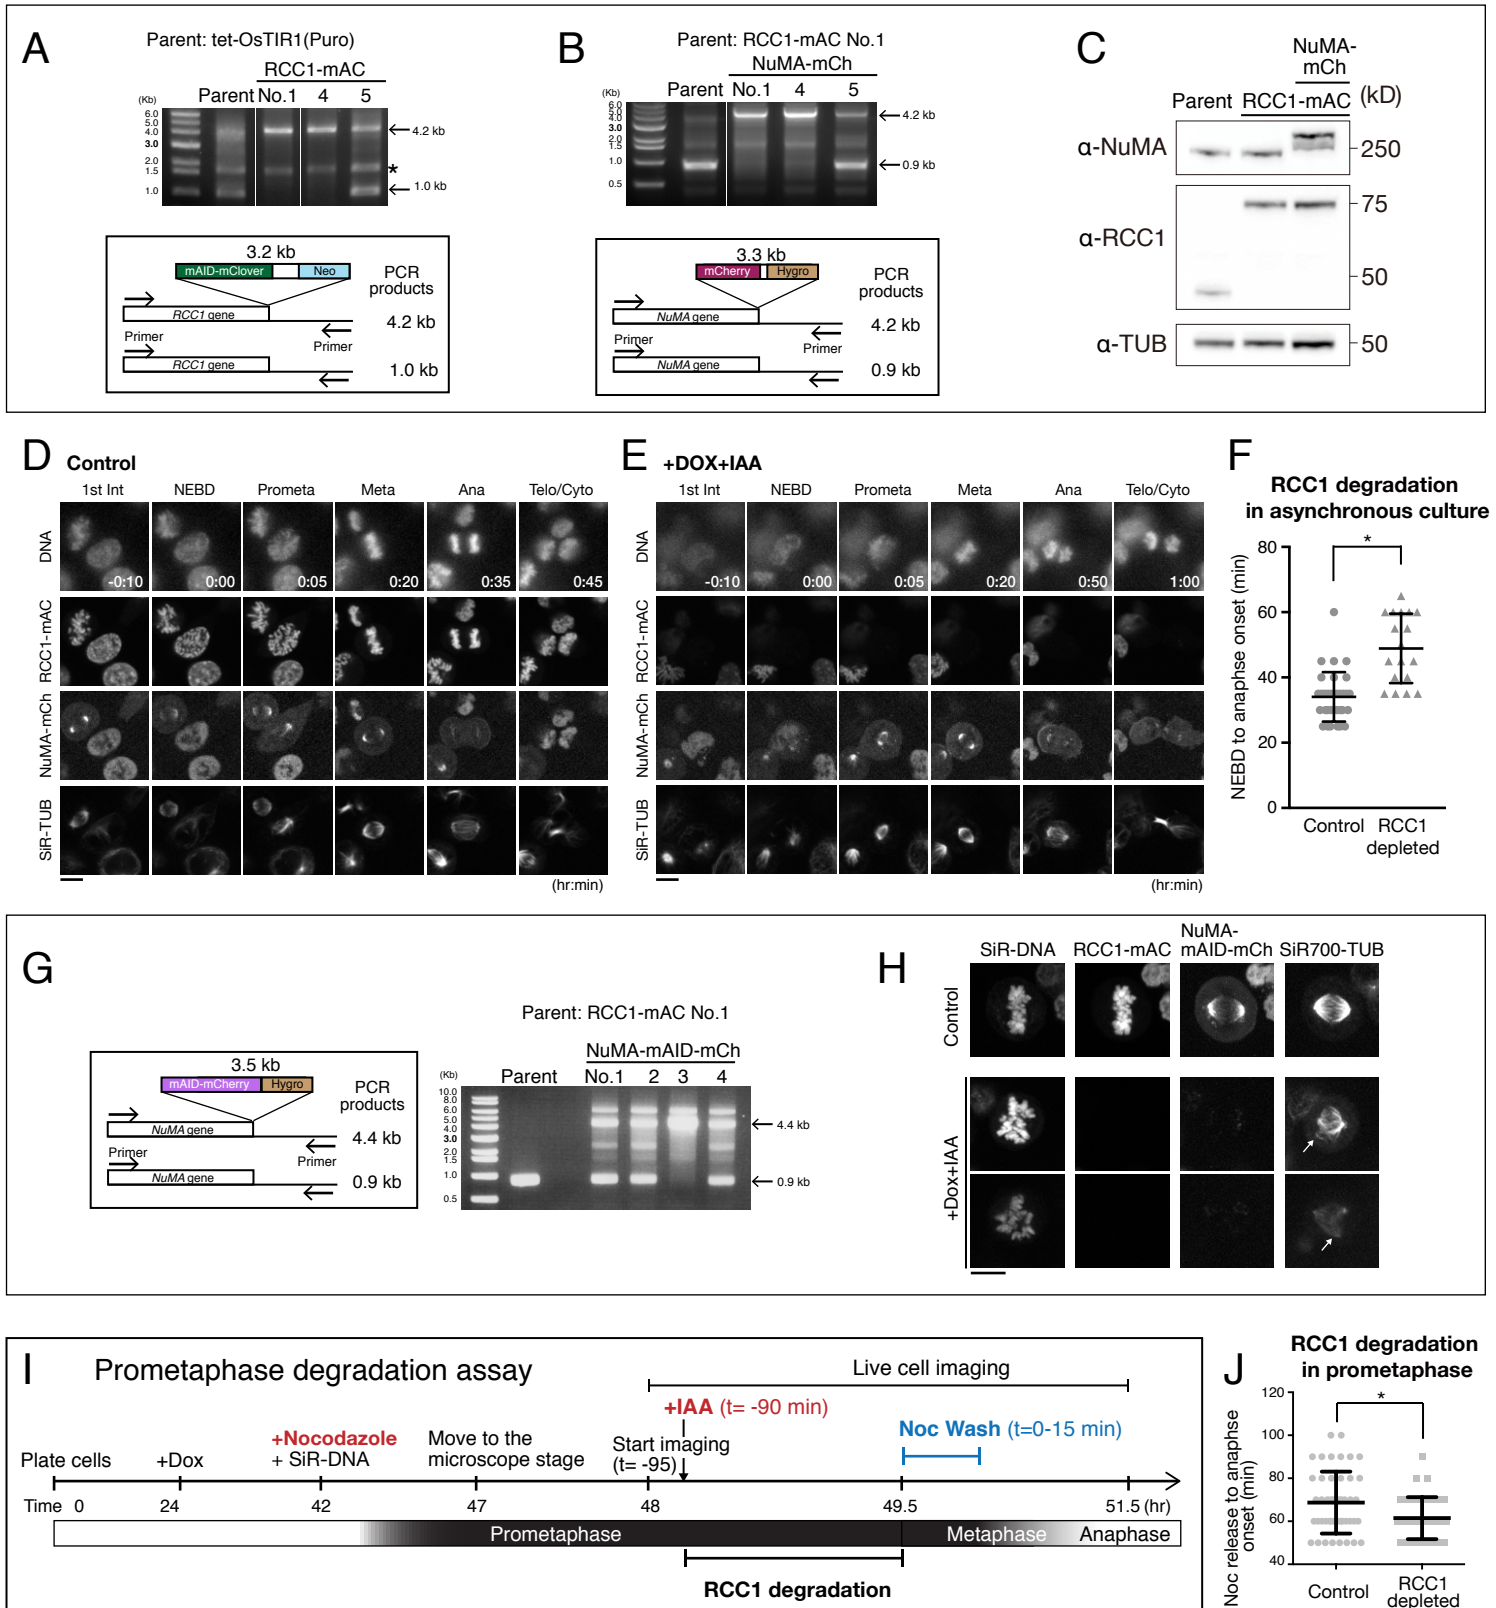

Figure S2. Generation of cell lines for auxin-inducible degradation of endogenous RCC1.



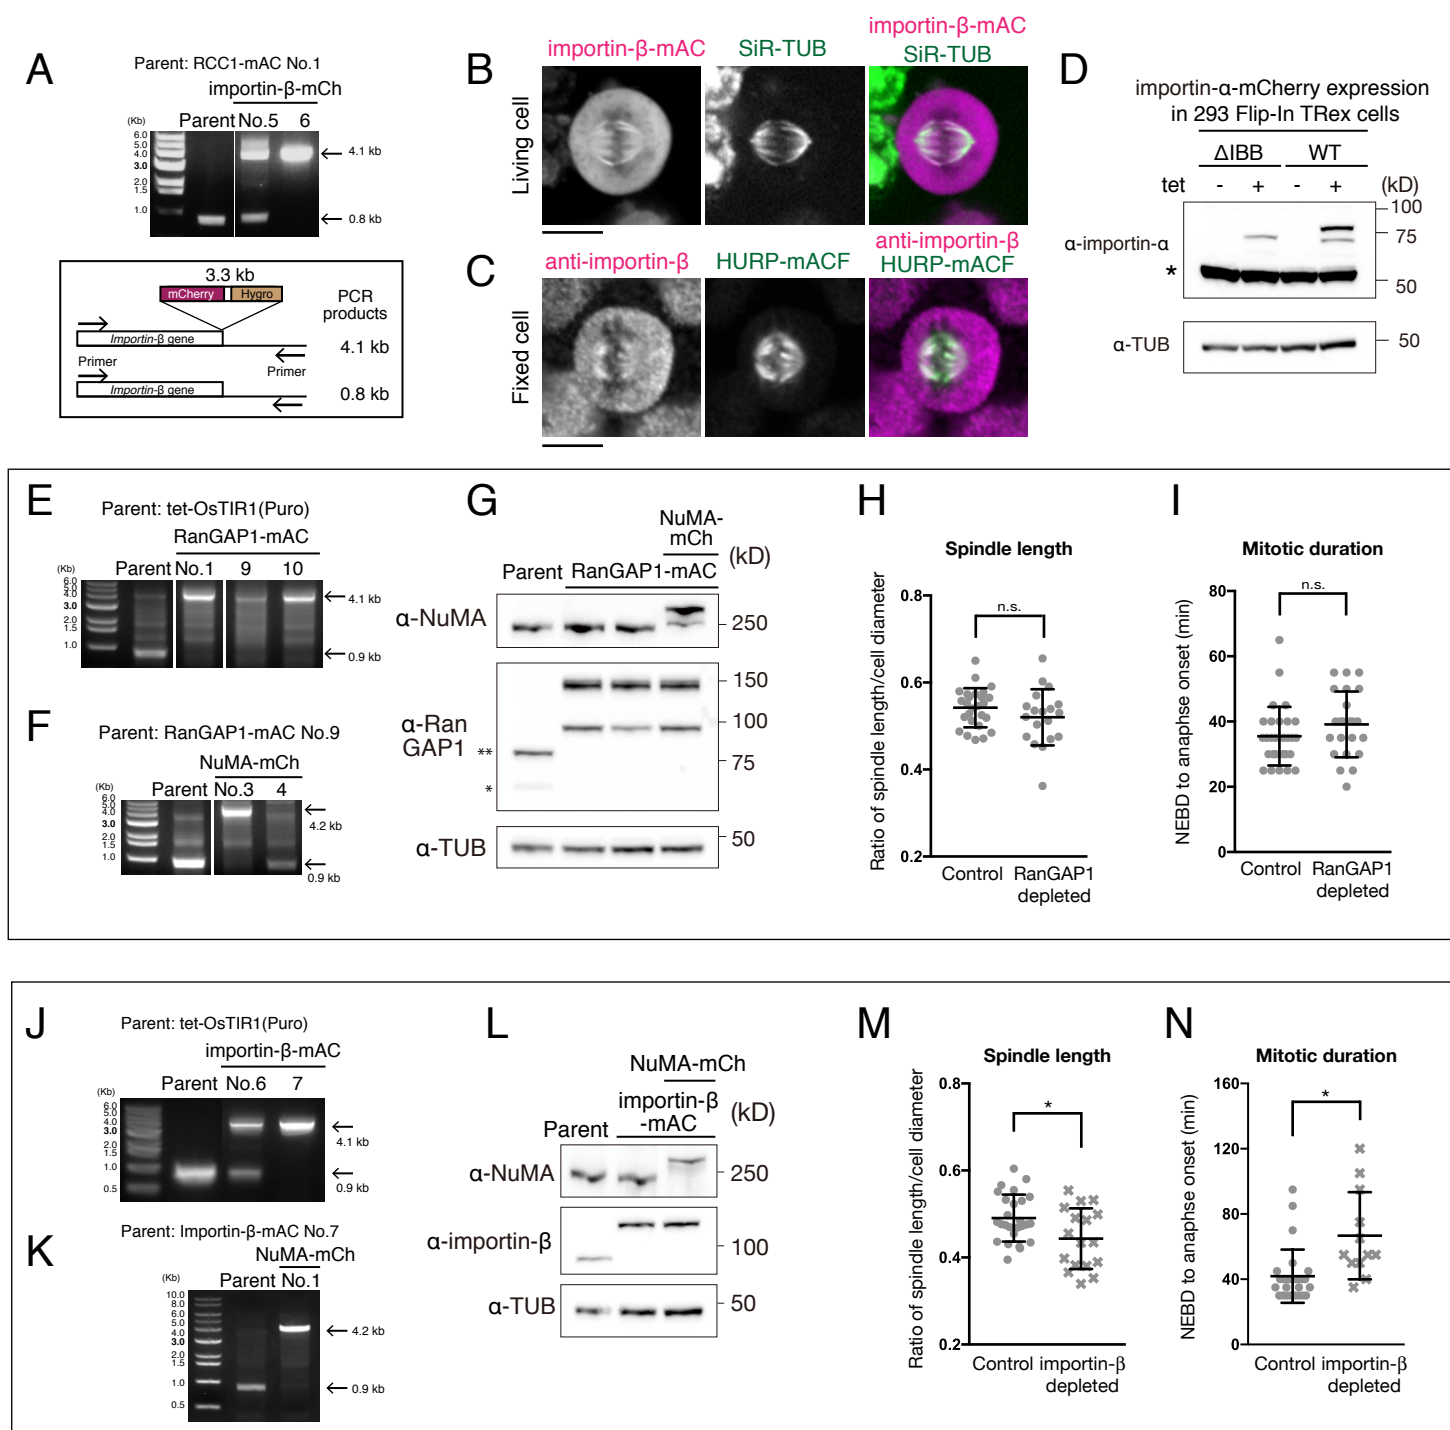

Figure S3. Generation of cell lines for auxin-inducible degradation of endogenous Ran-GAP1 and importin- $\beta$ .

# Supplemental Figure S4

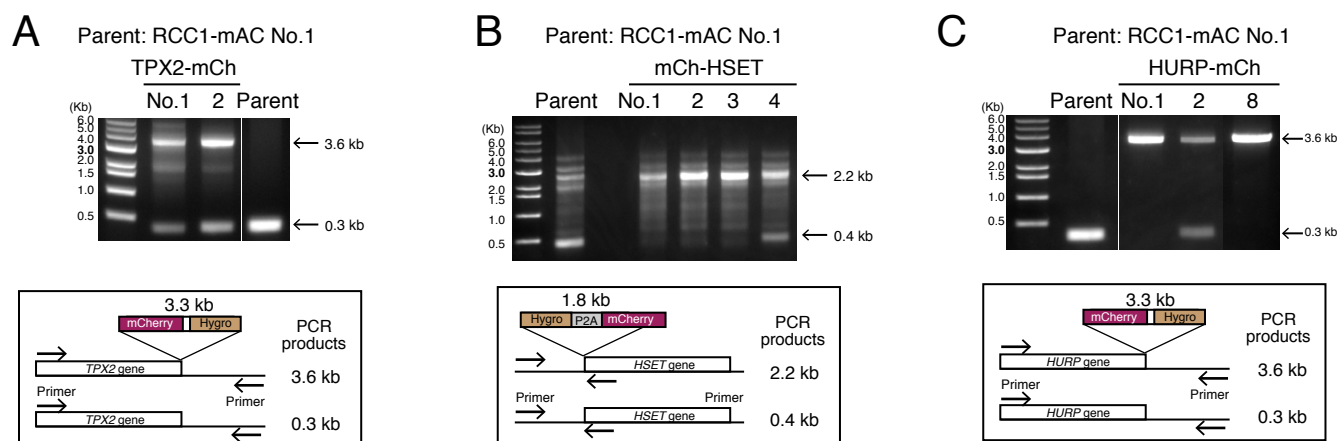

Figure S4. Generation of double knock-in cell lines that express RCC1-mAC and mCherry-fused TPX2, HSET, or HURP.

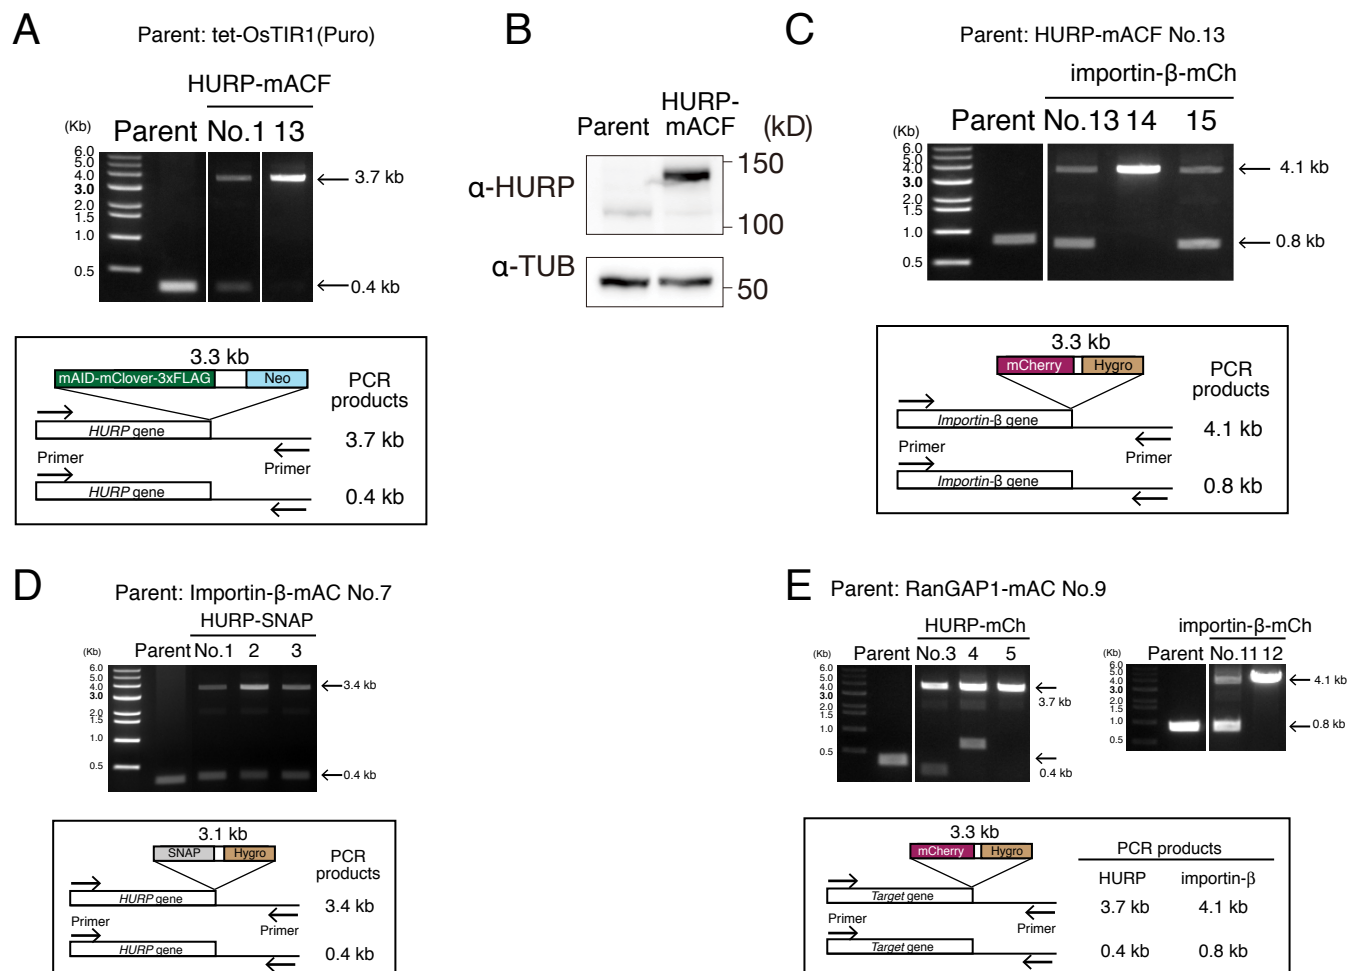

Figure S5. Generation of cell lines that degrade or visualize endogenous HURP.

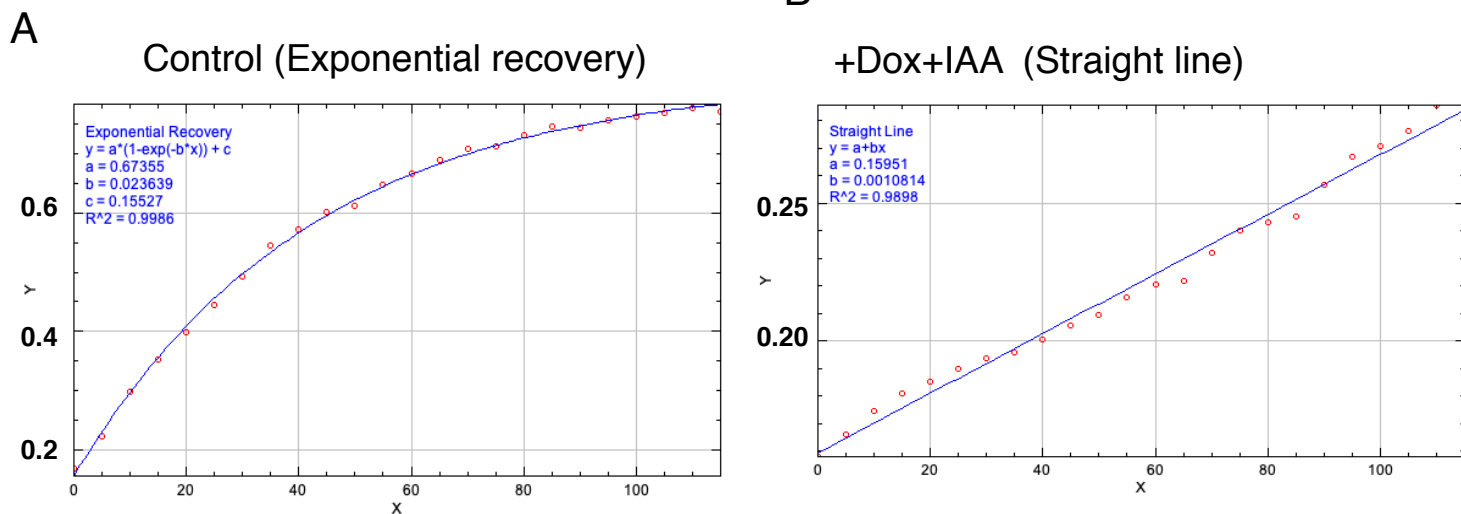

Figure S6. Fluorescent recovery kinetics of HURP in the presence or absence of importin- $\beta$
